# Supplementary material for: Development of a Public-Domain Measure of Two-Dimensional Rotation Ability and Preliminary Evidence for Discriminant Validity among Occupations
Source: MDPI journal article supplement (doi:10.3390/jintelligence11100191), 2023-10-03
Supplement: s1 [file s1]

# Two-Dimensional Rotation Ability Scale Development

[Masked for review], [Masked for review]

## Contents

|                                                                           |           |
|---------------------------------------------------------------------------|-----------|
| <b>Loading packages and data</b>                                          | <b>2</b>  |
| <b>Participants</b>                                                       | <b>2</b>  |
| <b>Identifying 2D rotation items with enough pairwise administrations</b> | <b>4</b>  |
| <b>Factor structure and dimensionality</b>                                | <b>7</b>  |
| <b>IRT analyses of the items</b>                                          | <b>13</b> |
| Item parameters for general factor . . . . .                              | 13        |
| Lower-order factors . . . . .                                             | 20        |
| <b>Correlations between 2D rotation and other individual differences</b>  | <b>23</b> |
| Cognitive abilities . . . . .                                             | 23        |
| Temperament . . . . .                                                     | 25        |
| O*NET job characteristics . . . . .                                       | 26        |
| Occupations and Majors . . . . .                                          | 28        |

## Loading packages and data

The dataset (“ICARdata”) contains IRT scale scores for the 27 traits of the SAPA Personality Inventory (SPI) and cognitive ability scale scores based on the International Cognitive Ability Resource (ICAR), which includes measures of 3D rotation, verbal reasoning, associative ability, propositional reasoning, matrix reasoning, and letter-number series problem-solving. In addition, sum scores for the Big Five personality traits were generated using the SPI items.

```
library(psych)
library(tidyverse)
library(here)
library(rio)
library(mirt)
library(latticeExtra)
library(knitr)
library(kableExtra)
library(flextable)

options(scipen = 999)

# Loading data with IRT scores for R2D
#load("~/Desktop/Projects/2D_Rotation/R2Ddata07feb2017thru26feb2023.rdata")
load("~/Desktop/Projects/2D_Rotation/ICARdata_06March.rdata")
```

## Participants

First, participants are excluded from analyses if they are under the age of 14 or if they did not report speaking English at least “Well” (i.e., they selected “Not Well” or “Not at all, need translation”).

```
ICARdata <- ICARdata %>%
  # Filter for participants who are at least 14
  filter(age>13) %>%
  # Filter for english fluency
  filter(english=="Well" | english=="VeryWellFluentNative")

totalN <- nrow(ICARdata)
```

This initial sample included a total of 1,558,035 participants. Below, the subset of participants who responded to at least 1 2D rotation item is identified.

```
ICARdata <- ICARdata %>%
  mutate(R2Dcount = rowSums(!is.na(.[[86:389]]))) %>% # Count the number of non NAs across the R2D items
  filter(R2Dcount > 0) # At least 1 non NA response
```

The final sample included a total of 1,020,195 participants (68.68 % female) who responded to items on the SAPA project website ([www.sapa-project.org](http://www.sapa-project.org)) in exchange for information about their personalities. The sample ranged in age from 14 to 90 years, with a mean of 26.8 ( $sd = 12.8$ ). A total of 233 nation states were included (27.76% U.S.). Information on participant employment status, educational attainment, ethnicity (for U.S. participants only), and English fluency is shown in the tables below. Note that responses to these items were not required so the total number of participants included in these tables is less than the complete sample used for these analyses.

Table S1: Educational attainment

| Educational Attainment                        | Participants | Percentage |
|-----------------------------------------------|--------------|------------|
| Less than 12 years                            | 93,923       | 10.4%      |
| High school graduate                          | 131,520      | 14.5%      |
| Currently in college/university               | 246,058      | 27.2%      |
| Some college/university, but did not graduate | 54,141       | 6%         |
| Associate degree                              | 26,848       | 3%         |
| College/university degree                     | 177,844      | 19.6%      |
| Currently in graduate or professional school  | 37,621       | 4.2%       |
| Graduate or professional school degree        | 138,174      | 15.2%      |

Table S2: Ethnicity (U.S. participants only)

| Ethnicity/Race          | Participants | Percentage |
|-------------------------|--------------|------------|
| White                   | 138,186      | 73%        |
| Two or more ethnicities | 10,526       | 5.6%       |
| African American        | 10,149       | 5.4%       |
| Mexican American        | 9,415        | 5%         |
| Other Hispanic          | 5,307        | 2.8%       |
| Chinese                 | 2,272        | 1.2%       |
| Other Asian             | 1,914        | 1%         |
| Puerto Rican            | 1,779        | 0.9%       |
| Indian                  | 1,760        | 0.9%       |
| Filipino                | 1,666        | 0.9%       |
| Native American         | 1,498        | 0.8%       |
| Other                   | 1,475        | 0.8%       |
| Korean                  | 1,052        | 0.6%       |
| None of these           | 725          | 0.4%       |
| Cuban American          | 567          | 0.3%       |
| Japanese                | 500          | 0.3%       |
| Other Pacific Islander  | 241          | 0.1%       |
| Native Hawaiian         | 190          | 0.1%       |
| Alaskan Native          | 129          | 0.1%       |

Table S3: Employment status

| Job Status                 | Participants | Percentage |
|----------------------------|--------------|------------|
| Currently a student        | 352,149      | 41.7%      |
| Employed                   | 333,146      | 39.4%      |
| Not employed               | 72,376       | 8.6%       |
| Not employed, seeking work | 46,411       | 5.5%       |
| Retired                    | 25,204       | 3%         |
| Homemaker                  | 15,732       | 1.9%       |

Table S4: English fluency

| English fluency  | Participants | Percentage |
|------------------|--------------|------------|
| Very well/fluent | 591,868      | 58%        |
| Well             | 428,327      | 42%        |
| Need Translation | 0            | 0%         |
| Not Well         | 0            | 0%         |

### Descriptive statistics for all 2D rotation items

```
# Subsetting the data for just the 2D rotation items
Rot2D <- subset(ICARdata, select = c(q_16001:q_16304))

# number of pairwise admins for all 304 item pairs
R2D_pairwise_counts <- pairwiseCount(Rot2D, diagonal=FALSE)
pwise_counts_table_unfiltered <- psych::describe(R2D_pairwise_counts)

R2D_pairwise_counts_summary <- as.vector(R2D_pairwise_counts
[lower.tri(R2D_pairwise_counts)])

psych::describe(R2D_pairwise_counts_summary)

##      vars      n  mean    sd median trimmed  mad min max range skew kurtosis   se
## X1      1 46056 36.69 132.09      6   5.79 2.97   0 691   691 4.03   14.27 0.62
```

## Identifying 2D rotation items with enough pairwise administrations

There are a total of 304 algorithmically generated 2D rotation items. This large pool of initial items was generated to ensure that there would be a final subset of high-quality items that cover a broad range of difficulty (i.e., enough items that are relatively easy or difficult, which are needed to distinguish between participants at higher levels of 2D rotation ability and at lower levels of 2D rotation ability).

Once developed, all 304 items were administered a relatively small number of times ( $m = 1226.19$ );  $Mdn = 1224$ ; minimum = 1138) on the SAPA Project website in order to identify mean estimates of their difficulty based on the proportion of correct responses. In this way, a subset of the initial 304 items was identified for further testing and validation. The items reported on in the current study ( $N = 70$ ) were then subsequently administered at much higher rates until they reached a minimum of 500 pairwise administrations with one another (i.e., among the smaller 70-item set, not the complete pool of 304 items). The histogram below shows the number of administrations for all 304 items, with the 70 items that were selected for further development at the high end of the range (>20,000 administrations) and the remainder at the low end.

```
# column sums to get total number of total administrations
admins <- as.data.frame(colSums(!is.na(Rot2D))) %>%
  dplyr::rename(admins = 1) %>%
  dplyr::arrange(desc(admins))
```

Figure S1. Total number of administrations per item

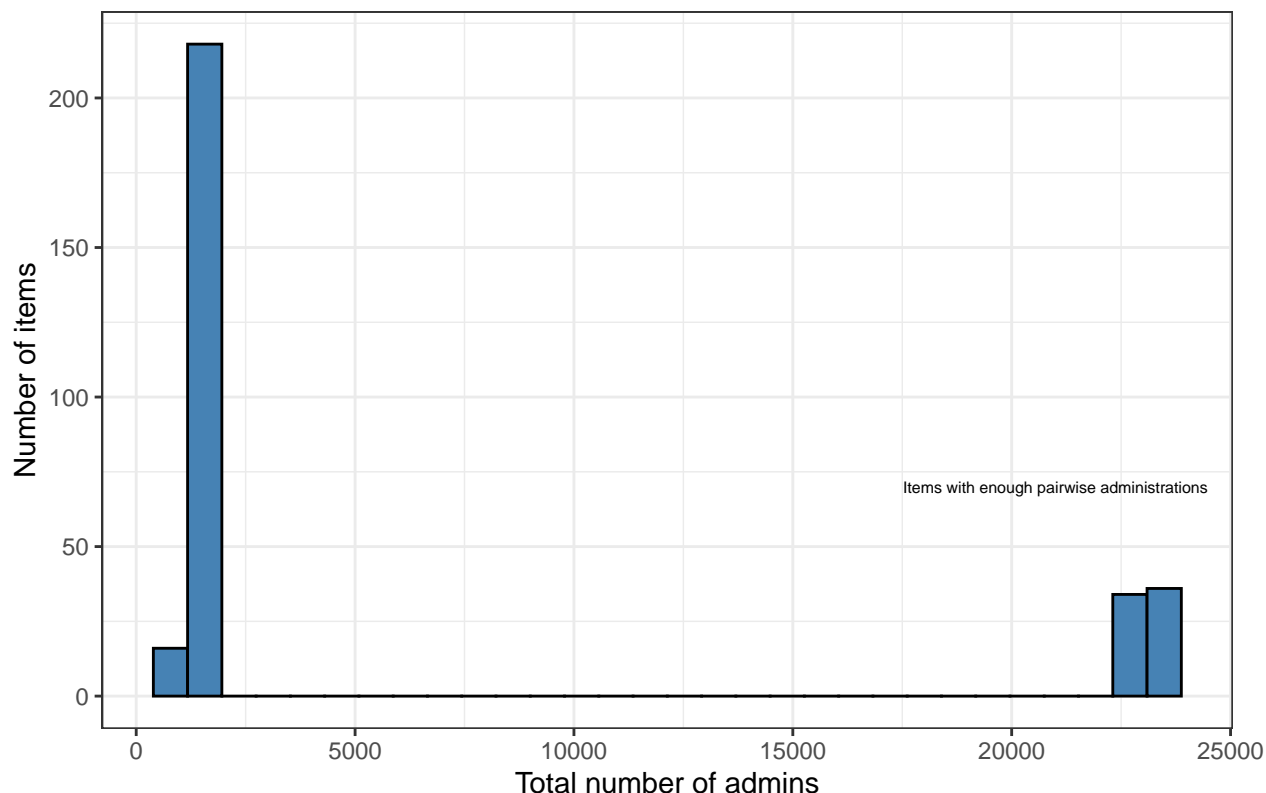

Most items ( $N = 234$  out of 304) have not been administered frequently enough with each of the other items. We remove these items below and then re-evaluate the number of minimum pairwise administrations per item using the remaining 70 items. To be clear, the pairwise counts shown in table S5 are limited to these 70 items as a set.

```
# filtering dataframe of items
admin_rows <- admins %>% row.names()
R2D_item_nums <- admin_rows[1:70] # items with enough overall administrations
# Sub-setting the data to get only the items with enough admins
Rot2D_subset <- subset(Rot2D, select = c(R2D_item_nums))
# Getting pairwise administrations for these items
```

```
R2D_pairwise_counts_filter <- pairwiseCount(Rot2D_subset, diagonal = FALSE)
pwise_counts_table_filter <- psych::describe(R2D_pairwise_counts_filter)
```

Table S5: Pairwise admins for subset of 70 items

|         | mean   | sd    | median | min | max | range |
|---------|--------|-------|--------|-----|-----|-------|
| q_16294 | 619.39 | 24.95 | 617    | 567 | 682 | 115   |
| q_16065 | 619.00 | 24.28 | 617    | 562 | 682 | 120   |
| q_16057 | 604.35 | 25.74 | 603    | 559 | 691 | 132   |
| q_16279 | 608.64 | 25.02 | 613    | 559 | 669 | 110   |
| q_16235 | 610.01 | 26.04 | 610    | 558 | 669 | 111   |
| q_16069 | 608.23 | 21.29 | 608    | 558 | 672 | 114   |
| q_16230 | 609.49 | 27.53 | 609    | 555 | 675 | 120   |
| q_16298 | 606.17 | 25.80 | 603    | 555 | 672 | 117   |
| q_16195 | 615.48 | 24.99 | 619    | 554 | 685 | 131   |
| q_16292 | 600.70 | 25.05 | 598    | 553 | 662 | 109   |
| q_16056 | 608.09 | 23.49 | 607    | 552 | 677 | 125   |
| q_16026 | 604.23 | 23.75 | 602    | 551 | 659 | 108   |
| q_16023 | 608.83 | 22.86 | 609    | 550 | 657 | 107   |
| q_16050 | 604.10 | 25.74 | 600    | 550 | 672 | 122   |
| q_16086 | 596.45 | 24.23 | 592    | 549 | 675 | 126   |
| q_16225 | 602.61 | 30.27 | 605    | 548 | 670 | 122   |
| q_16009 | 597.88 | 22.51 | 597    | 548 | 646 | 98    |
| q_16118 | 596.00 | 21.88 | 597    | 548 | 660 | 112   |
| q_16138 | 596.72 | 25.15 | 594    | 548 | 651 | 103   |
| q_16125 | 596.94 | 24.69 | 600    | 547 | 651 | 104   |
| q_16042 | 609.19 | 28.37 | 611    | 546 | 681 | 135   |
| q_16221 | 599.81 | 21.37 | 599    | 546 | 652 | 106   |
| q_16061 | 597.32 | 23.40 | 596    | 546 | 657 | 111   |
| q_16053 | 594.55 | 21.50 | 595    | 546 | 638 | 92    |
| q_16087 | 612.61 | 23.86 | 616    | 546 | 671 | 125   |
| q_16285 | 593.29 | 24.54 | 593    | 546 | 652 | 106   |
| q_16035 | 591.59 | 25.71 | 592    | 546 | 640 | 94    |
| q_16082 | 605.81 | 21.30 | 607    | 545 | 683 | 138   |
| q_16281 | 602.28 | 25.01 | 601    | 545 | 668 | 123   |
| q_16171 | 593.67 | 26.28 | 595    | 545 | 651 | 106   |
| q_16016 | 600.06 | 26.56 | 601    | 545 | 665 | 120   |
| q_16240 | 594.19 | 23.32 | 594    | 545 | 650 | 105   |
| q_16140 | 600.54 | 24.62 | 602    | 544 | 652 | 108   |
| q_16105 | 590.03 | 24.83 | 590    | 543 | 659 | 116   |
| q_16258 | 600.80 | 26.06 | 602    | 541 | 667 | 126   |
| q_16272 | 593.75 | 23.02 | 595    | 541 | 662 | 121   |
| q_16193 | 592.51 | 23.15 | 592    | 541 | 652 | 111   |
| q_16232 | 603.81 | 27.48 | 604    | 540 | 670 | 130   |
| q_16001 | 588.29 | 22.65 | 587    | 538 | 643 | 105   |
| q_16247 | 599.01 | 26.04 | 598    | 538 | 667 | 129   |
| q_16287 | 587.75 | 25.88 | 586    | 538 | 655 | 117   |
| q_16253 | 598.42 | 22.46 | 600    | 537 | 655 | 118   |
| q_16085 | 589.94 | 24.94 | 588    | 537 | 648 | 111   |
| q_16101 | 590.81 | 25.32 | 590    | 536 | 649 | 113   |
| q_16048 | 602.06 | 27.17 | 601    | 535 | 683 | 148   |
| q_16202 | 585.29 | 24.36 | 582    | 535 | 644 | 109   |
| q_16203 | 591.48 | 28.49 | 593    | 533 | 654 | 121   |
| q_16269 | 591.58 | 24.92 | 590    | 533 | 648 | 115   |
| q_16109 | 595.29 | 30.44 | 591    | 530 | 663 | 133   |
| q_16112 | 600.20 | 24.06 | 599    | 530 | 648 | 118   |
| q_16063 | 593.19 | 25.92 | 592    | 530 | 681 | 151   |
| q_16265 | 601.28 | 25.64 | 602    | 529 | 655 | 126   |
| q_16220 | 593.91 | 27.28 | 594    | 529 | 670 | 141   |
| q_16055 | 602.97 | 24.60 | 605    | 527 | 648 | 121   |

Table S5: Pairwise admins for subset of 70 items (*continued*)

|         | mean   | sd    | median | min | max | range |
|---------|--------|-------|--------|-----|-----|-------|
| q_16104 | 587.88 | 27.04 | 589    | 527 | 658 | 131   |
| q_16211 | 585.43 | 25.32 | 582    | 527 | 636 | 109   |
| q_16004 | 581.36 | 26.88 | 579    | 526 | 643 | 117   |
| q_16150 | 603.45 | 27.53 | 602    | 526 | 685 | 159   |
| q_16249 | 588.74 | 26.28 | 591    | 526 | 647 | 121   |
| q_16283 | 583.61 | 20.82 | 581    | 526 | 635 | 109   |
| q_16047 | 589.33 | 25.94 | 591    | 525 | 672 | 147   |
| q_16099 | 591.59 | 27.82 | 594    | 525 | 650 | 125   |
| q_16223 | 592.29 | 27.28 | 590    | 524 | 679 | 155   |
| q_16146 | 587.32 | 25.29 | 585    | 524 | 640 | 116   |
| q_16008 | 578.59 | 22.13 | 581    | 524 | 623 | 99    |
| q_16021 | 607.48 | 28.44 | 612    | 523 | 691 | 168   |
| q_16102 | 594.38 | 27.81 | 592    | 518 | 661 | 143   |
| q_16147 | 588.12 | 26.46 | 588    | 517 | 645 | 128   |
| q_16144 | 587.20 | 28.47 | 582    | 511 | 649 | 138   |
| q_16204 | 576.51 | 27.27 | 579    | 511 | 639 | 128   |

```
R2D_pairwise_counts_filter_summary <- as.vector(R2D_pairwise_counts_filter
[lower.tri(R2D_pairwise_counts_filter)])
```

```
psych::describe(R2D_pairwise_counts_filter_summary)
```

```
##      vars      n  mean    sd median trimmed  mad min max range skew kurtosis  se
## X1      1 2415 597.48 26.73   597   597.34 26.69 511 691   180 0.06    0.01 0.54
```

**Figure S2. pairwise administrations across item pairs**

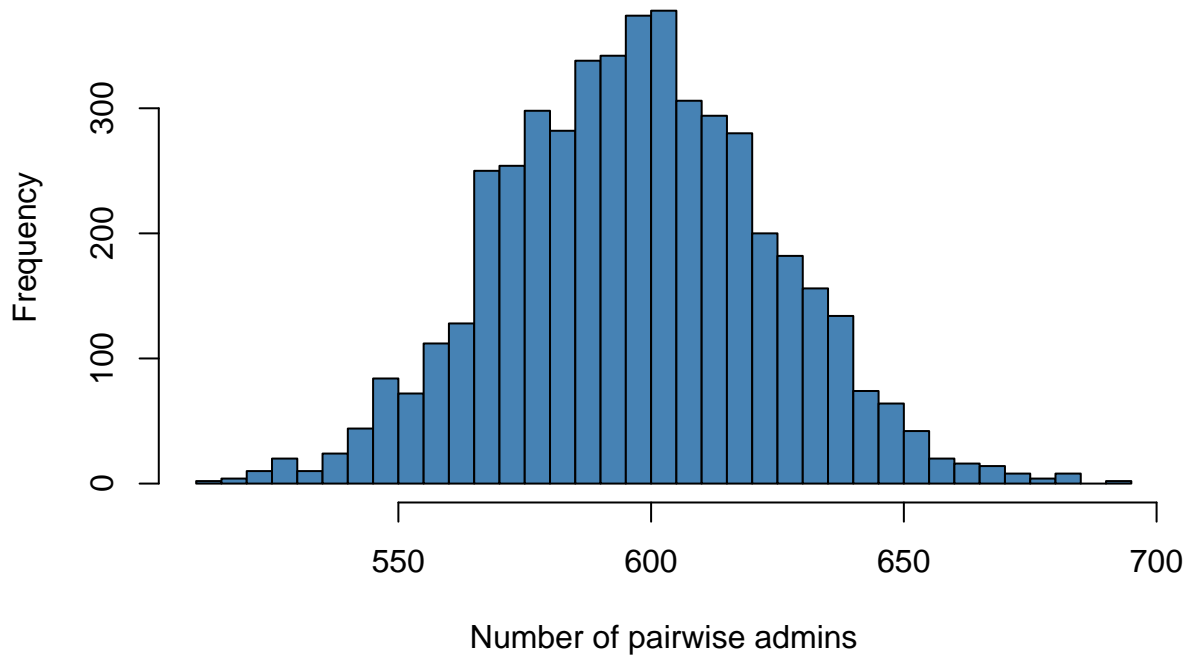

## Factor structure and dimensionality

The following code was used to examine the factor structure and dimensionality of the 2D rotation items. Unidimensionality is assessed using the omega hierarchical ( $\omega_h$ ) coefficient, obtained using the 'omega()''

function from the psych package (Revelle, 2022).  $\alpha$  and  $\omega_t$  are used to evaluate internal consistency.

```
# Correlation matrix of subset of items  
cor_matrix <- cor(Rot2D_subset, use = "pairwise")  
cor_matrix_smoothed <- cor.smooth(cor_matrix)
```

The following images show the inter-item correlations arranged by general factor loading across factor solutions with 1 through 6 factors. Inspection of the plots suggests that there are up to four lower-order factors.

**Figure S3. inter-item correlations for factor solutions with 1–6 factors**

One factor

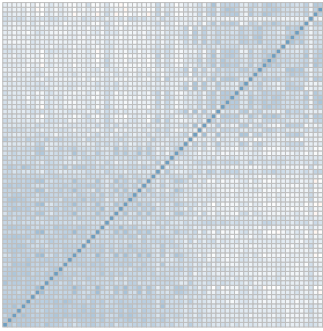

Two factors

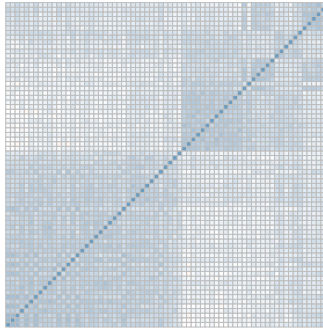

Three factors

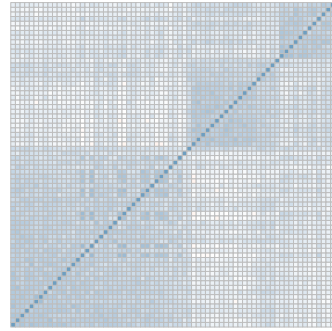

Four factors

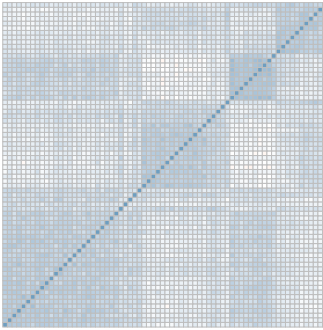

Five factors

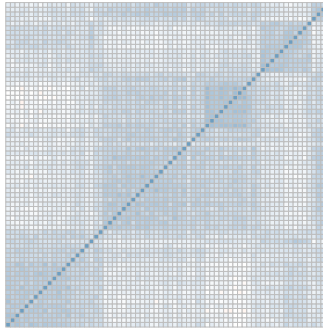

Six factors

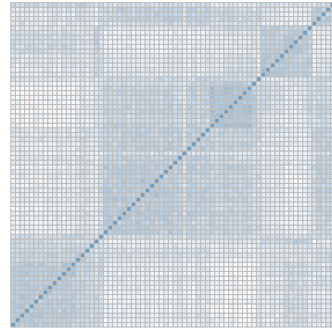



Next, the omega function is run for the one factor and four factor solutions to determine general factor saturation, indicated by  $\omega_h$  and internal consistency (indicated by  $\omega_t$  and  $\alpha$ ).

```
omega1 <- omega(cor_matrix_smoothed, plot = FALSE)
omega4 <- omega(cor_matrix_smoothed, nfactors = 4, plot = FALSE)

omega1$omega_h

## [1] 0.4749996

omega4$omega_h

## [1] 0.6645101
```

Omega hierarchical for the single-factor model ( $\omega_h = 0.47$ ) suggests poor fit. Based on the correlation plots above and the improvement in unidimensionality when extracting four lower-order factors ( $\omega_h = 0.66$ ), there appear to be several lower-order factors in the data. Table S6 shows the loadings of items by factor (see below for more description of the factor labels).

Table S6: Factor loadings

| item    | Rotate_both | Rotate_stimuli | Rotate_answer | Rotate_none | Communality | Uniqueness | Complexity |
|---------|-------------|----------------|---------------|-------------|-------------|------------|------------|
| q_16109 | 0.76        |                |               |             | 0.51        | 0.49       | 1.15       |
| q_16112 | 0.71        |                |               |             | 0.54        | 0.46       | 1.01       |
| q_16147 | 0.68        |                |               |             | 0.45        | 0.55       | 1.01       |
| q_16204 | 0.68        |                |               |             | 0.56        | 0.44       | 1.07       |
| q_16102 | 0.66        |                |               |             | 0.47        | 0.53       | 1.04       |
| q_16146 | 0.65        |                |               |             | 0.44        | 0.56       | 1.01       |
| q_16104 | 0.64        |                |               |             | 0.47        | 0.53       | 1.04       |
| q_16253 | 0.64        |                |               |             | 0.52        | 0.48       | 1.07       |
| q_16021 | 0.64        |                |               |             | 0.54        | 0.46       | 1.15       |
| q_16211 | 0.64        |                |               |             | 0.48        | 0.52       | 1.05       |
| q_16099 | 0.64        |                |               |             | 0.42        | 0.58       | 1.00       |
| q_16057 | 0.64        |                |               |             | 0.45        | 0.55       | 1.08       |
| q_16001 | 0.62        |                |               |             | 0.50        | 0.50       | 1.13       |
| q_16202 | 0.62        |                |               |             | 0.52        | 0.48       | 1.12       |
| q_16247 | 0.61        |                |               |             | 0.44        | 0.56       | 1.07       |
| q_16230 | 0.6         |                |               |             | 0.42        | 0.58       | 1.05       |
| q_16225 | 0.6         |                |               |             | 0.41        | 0.60       | 1.05       |
| q_16138 | 0.6         |                |               |             | 0.45        | 0.55       | 1.07       |
| q_16004 | 0.59        |                |               |             | 0.50        | 0.50       | 1.26       |
| q_16101 | 0.58        |                |               |             | 0.45        | 0.55       | 1.11       |
| q_16047 | 0.51        | 0.22           |               |             | 0.42        | 0.58       | 1.56       |
| q_16269 | 0.49        |                |               |             | 0.44        | 0.56       | 1.44       |
| q_16249 | 0.48        |                |               |             | 0.43        | 0.57       | 1.40       |
| q_16086 | 0.44        |                |               |             | 0.36        | 0.64       | 1.51       |
| q_16035 | 0.43        |                | 0.26          |             | 0.42        | 0.58       | 1.99       |
| q_16292 | 0.42        | 0.34           |               |             | 0.40        | 0.60       | 2.51       |
| q_16144 | 0.41        |                |               |             | 0.19        | 0.81       | 1.06       |
| q_16085 | 0.4         | 0.2            |               |             | 0.29        | 0.71       | 1.92       |
| q_16023 | 0.3         | 0.3            |               |             | 0.38        | 0.62       | 2.71       |
| q_16118 | 0.3         | 0.21           | 0.21          |             | 0.31        | 0.69       | 2.68       |
| q_16240 |             | 0.76           |               |             | 0.58        | 0.42       | 1.02       |
| q_16220 |             | 0.74           |               |             | 0.50        | 0.50       | 1.14       |
| q_16087 |             | 0.71           |               |             | 0.51        | 0.49       | 1.01       |
| q_16008 |             | 0.7            |               |             | 0.51        | 0.49       | 1.07       |
| q_16042 |             | 0.7            |               |             | 0.54        | 0.46       | 1.15       |
| q_16140 |             | 0.69           |               |             | 0.47        | 0.53       | 1.07       |
| q_16258 |             | 0.68           |               |             | 0.49        | 0.51       | 1.04       |

Table S6: Factor loadings (*continued*)

| item    | Rotate_both | Rotate_stimuli | Rotate_answer | Rotate_none | Communality | Uniqueness | Complexity |
|---------|-------------|----------------|---------------|-------------|-------------|------------|------------|
| q_16272 |             | 0.65           |               |             | 0.46        | 0.54       | 1.06       |
| q_16150 |             | 0.65           |               |             | 0.48        | 0.52       | 1.10       |
| q_16279 |             | 0.65           |               |             | 0.50        | 0.50       | 1.16       |
| q_16221 |             | 0.64           |               |             | 0.52        | 0.48       | 1.16       |
| q_16026 |             | 0.64           |               |             | 0.51        | 0.49       | 1.09       |
| q_16298 |             | 0.64           |               |             | 0.43        | 0.57       | 1.10       |
| q_16203 |             | 0.6            |               |             | 0.48        | 0.52       | 1.29       |
| q_16048 | 0.31        | 0.46           |               |             | 0.37        | 0.63       | 1.95       |
| q_16016 | 0.31        | 0.45           |               |             | 0.41        | 0.59       | 1.86       |
| q_16223 | 0.32        | 0.44           |               |             | 0.35        | 0.65       | 1.91       |
| q_16171 |             | 0.41           |               |             | 0.27        | 0.73       | 1.32       |
| q_16265 |             | 0.37           | 0.31          | 0.34        | 0.42        | 0.58       | 3.56       |
| q_16294 |             |                | 0.79          |             | 0.69        | 0.31       | 1.03       |
| q_16235 |             |                | 0.76          |             | 0.58        | 0.42       | 1.09       |
| q_16195 |             |                | 0.73          |             | 0.52        | 0.48       | 1.04       |
| q_16056 |             |                | 0.67          |             | 0.58        | 0.42       | 1.11       |
| q_16082 |             |                | 0.65          |             | 0.55        | 0.45       | 1.08       |
| q_16287 |             |                | 0.65          |             | 0.60        | 0.40       | 1.13       |
| q_16283 | 0.22        |                | 0.63          |             | 0.67        | 0.33       | 1.43       |
| q_16050 |             |                | 0.6           |             | 0.57        | 0.43       | 1.35       |
| q_16063 | 0.21        |                | 0.57          |             | 0.61        | 0.39       | 1.71       |
| q_16055 |             |                | 0.56          |             | 0.42        | 0.58       | 1.16       |
| q_16285 |             |                |               | 0.78        | 0.62        | 0.38       | 1.05       |
| q_16105 |             |                |               | 0.76        | 0.58        | 0.42       | 1.15       |
| q_16125 |             |                |               | 0.7         | 0.51        | 0.49       | 1.02       |
| q_16069 |             |                |               | 0.69        | 0.51        | 0.49       | 1.03       |
| q_16061 |             |                |               | 0.67        | 0.47        | 0.53       | 1.03       |
| q_16053 |             | 0.25           |               | 0.63        | 0.53        | 0.47       | 1.34       |
| q_16065 |             | 0.24           |               | 0.61        | 0.53        | 0.47       | 1.41       |
| q_16232 |             | 0.24           |               | 0.56        | 0.45        | 0.55       | 1.41       |
| q_16009 |             | 0.27           |               | 0.55        | 0.47        | 0.53       | 1.65       |
| q_16281 |             | 0.25           |               | 0.54        | 0.46        | 0.54       | 1.76       |
| q_16193 |             |                | 0.28          | 0.51        | 0.45        | 0.55       | 1.60       |

These lower-order factors appear to reflect differences in the type of mental rotation demanded by the items. Specifically, whether items require mental rotation of the stimuli, the answer option, both, or neither (i.e., the item does not require any mental rotation and merely requires participants to identify a missing piece of the stimuli). These factors represent all possible combinations of mental rotation of the stimuli and/or the answer option. An example of each of these four item types is shown below:

- **Factor 1:** Rotation of stimuli and of correct response option

Select the piece that completes the pattern on the right.

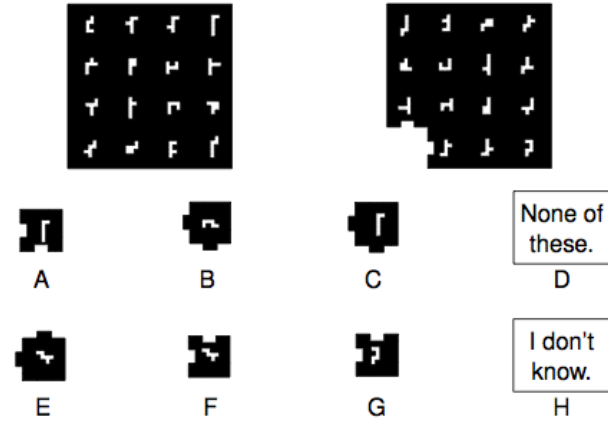

Figure S4. Example item for factor 1 (“rotate both”)

- **Factor 2:** No rotation of stimuli, but requires rotation of correct response option

Select the piece that completes the pattern on the right.

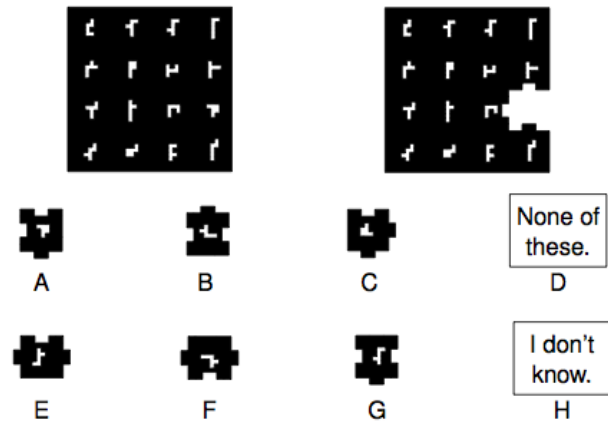

Figure S5. Example item for factor 2 (“rotate answer”)

- **Factor 3:** Rotation of stimuli, no rotation of correct response option (i.e., answer option fits in missing puzzle piece without rotation).

Select the piece that completes the pattern on the right.

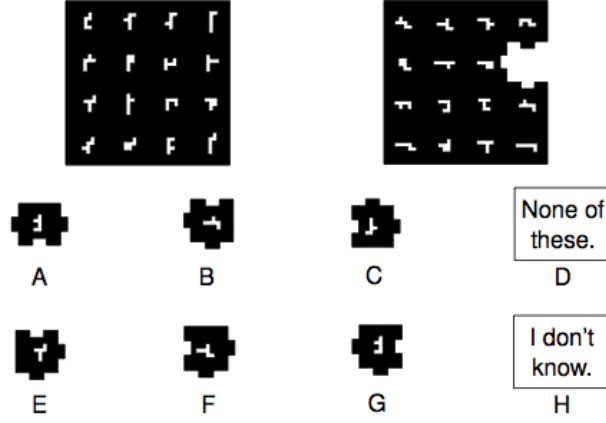

Figure S6. Example item for factor 3 (“rotate stimuli”)

- **Factor 4:** No rotation

Select the piece that completes the pattern on the right.

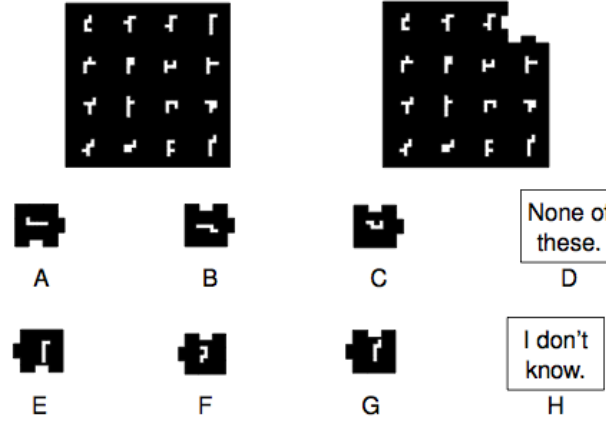

Figure S7. Example item for factor 4 (“rotate none”)

Recall that omega hierarchical for the single-factor model suggests poor unidimensionality ( $\omega_h = 0.47$ ). When extracting four lower-order factors, unidimensionality improves ( $\omega_h = 0.66$ ), though it remains lower than is optimal for item response theory based scoring.

Items with primary loadings onto the fourth lower-order factor (example shown in figure S7) do not appear to require mental rotation. That is, participants do not need to rotate either the stimuli or the answer option to arrive at the correct answer and only need to be able to identify the puzzle piece that is missing from the stimuli (e.g., option “E” for the item in figure S7 ). We suspected that these items may be decreasing the unidimensionality of the scale—which is designed to measure mental rotation ability—and decided to remove these items and re-evaluate the factor structure of the items. After removing these 12 items, unidimensionality improved to an acceptable level ( $\omega_h = 0.77$ ). After establishing adequate unidimensionality, we proceeded with IRT scoring.

## IRT analyses of the items

First, IRT scores were generated for the general 2D rotation factor. All items from the pool were retained except for those loading onto the lower-order factor which did not require any mental rotation to solve. This left a total of 58 items. We also generate IRT scores for the four lower-order factors, including the ability to solve items that did not require rotation (i.e., the pattern-matching items).

### Item parameters for general factor

Below, we remove items that do not require mental rotation and generate scores for general 2D rotation ability.

```
# Subsetting the data for unidimensional IRT scoring (remove items without rotation)
Rot2D_filtered <- Rot2D_subset %>%
  dplyr::select(-c("q_16009", "q_16053", "q_16061", "q_16065", "q_16069",
    "q_16105", "q_16125", "q_16193", "q_16232", "q_16265", "q_16281", "q_16285"))

dim(Rot2D_filtered)

## [1] 1020195      58

IRT_model_unidimensional <- mirt(Rot2D_filtered, 1, itemtype = "2PL",
  constrain = NULL)

save(IRT_model_unidimensional, file = "IRT_model_unidimensional.rdata")

# Item parameters for the general factor
IRT_model_unidimensional_parameters <- coef(IRT_model_unidimensional,
  IRTpars=TRUE, simplify = TRUE)

R2Dparameters <- IRT_model_unidimensional_parameters$items[,1:2]
R2Dparameters <- as.data.frame(R2Dparameters) %>%
  dplyr::mutate(item = rownames(.)) %>%
  relocate(item)
```

### Descriptive statistics for the item parameters:

```
# Item discrimination
psych::describe(R2Dparameters$a)

##      vars  n mean   sd median trimmed  mad   min   max range skew kurtosis  se
## X1      1 58 2.03 2.28   1.72   1.74 0.62 0.89 18.63 17.74 6.66   45.68 0.3

# Item difficulty
psych::describe(R2Dparameters$b)

##      vars  n mean   sd median trimmed  mad   min   max range skew kurtosis  se
## X1      1 58 0.35 0.69   0.43   0.35 0.77 -0.8 1.97  2.77 -0.02    -1 0.09
```

### Plotting item probability functions and test information function

**Figure S8. Item probability functions**

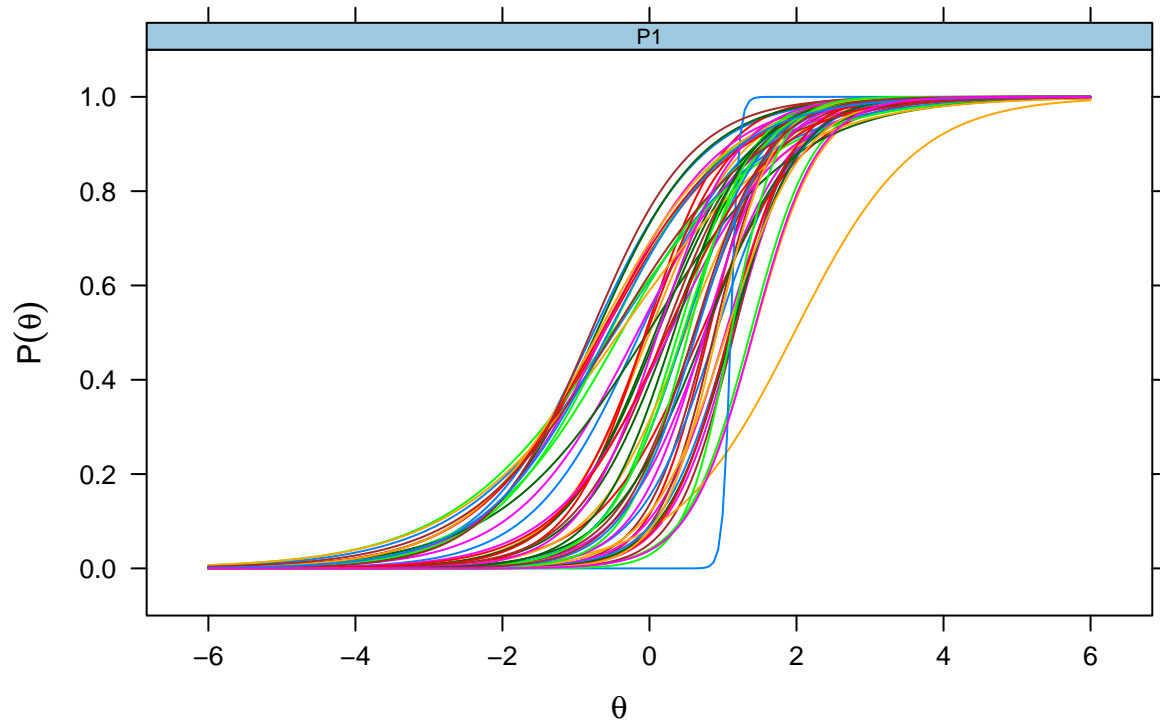

**Figure S9. Test Information and Standard Errors**

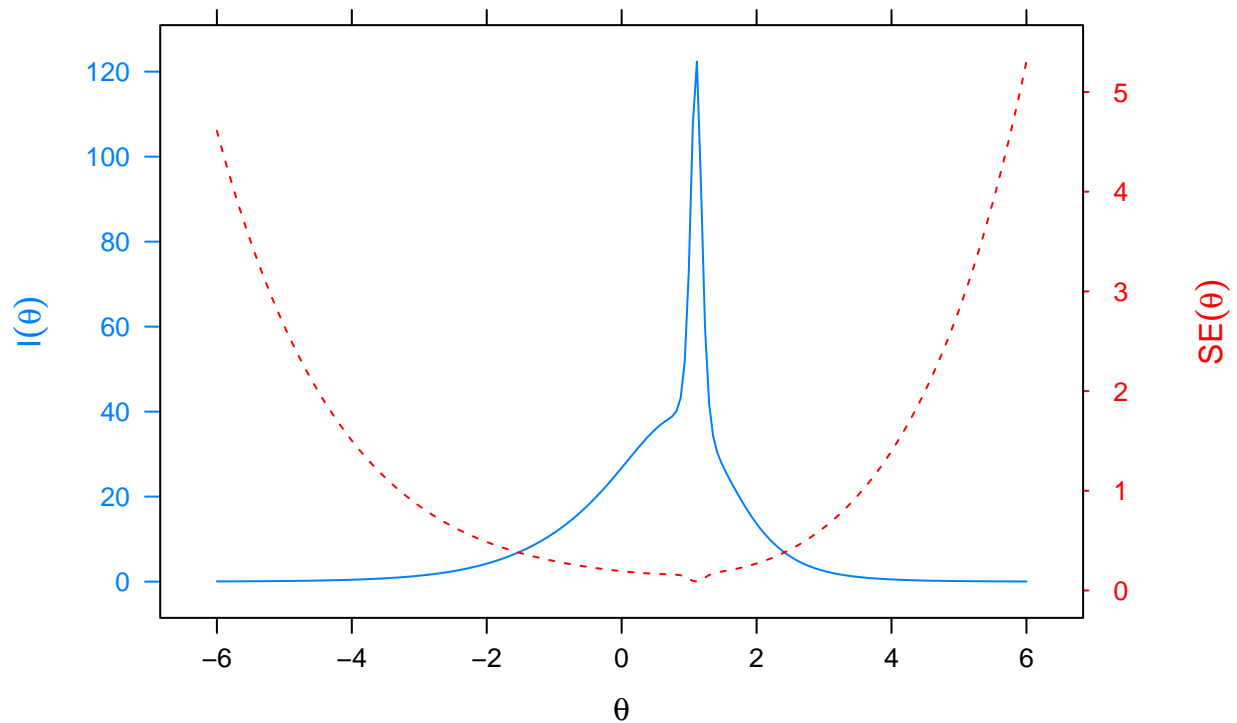

One of the items is interfering with the overall test. This item (q\_16104) has a very high discrimination value. It is shown below and highlighted in the table with IRT parameters for each item. Note that this is also the most difficult item in the set (lowest mean with a proportion of .12 for correct responses), and that

it has a challenging distractor response option (see Figure S10).

Table S7: Item descriptives and IRT parameters, in descending order of item discrimination (potentially problematic items highlighted)

| item    | mean | sd   | N      | discrimination | difficulty |
|---------|------|------|--------|----------------|------------|
| q_16104 | 0.12 | 0.33 | 23,106 | 18.63          | 1.11       |
| q_16204 | 0.17 | 0.37 | 22,651 | 3.17           | 1.11       |
| q_16202 | 0.23 | 0.42 | 22,677 | 2.65           | 0.92       |
| q_16112 | 0.24 | 0.42 | 23,107 | 2.60           | 0.88       |
| q_16253 | 0.26 | 0.44 | 23,627 | 2.54           | 0.81       |
| q_16004 | 0.17 | 0.38 | 23,241 | 2.52           | 1.15       |
| q_16021 | 0.27 | 0.44 | 23,590 | 2.36           | 0.79       |
| q_16211 | 0.20 | 0.40 | 22,808 | 2.35           | 1.09       |
| q_16001 | 0.35 | 0.48 | 22,795 | 2.35           | 0.53       |
| q_16230 | 0.14 | 0.35 | 23,406 | 2.31           | 1.37       |
| q_16099 | 0.13 | 0.34 | 22,517 | 2.29           | 1.41       |
| q_16101 | 0.18 | 0.39 | 23,557 | 2.28           | 1.15       |
| q_16102 | 0.13 | 0.34 | 23,438 | 2.23           | 1.42       |
| q_16138 | 0.20 | 0.40 | 22,822 | 2.20           | 1.12       |
| q_16147 | 0.20 | 0.40 | 22,899 | 2.12           | 1.10       |
| q_16269 | 0.29 | 0.45 | 22,863 | 2.09           | 0.75       |
| q_16109 | 0.21 | 0.41 | 23,388 | 2.08           | 1.03       |
| q_16057 | 0.40 | 0.49 | 23,617 | 2.06           | 0.39       |
| q_16247 | 0.33 | 0.47 | 22,769 | 2.02           | 0.64       |
| q_16035 | 0.34 | 0.47 | 22,640 | 2.00           | 0.61       |
| q_16249 | 0.38 | 0.49 | 22,922 | 1.96           | 0.46       |
| q_16146 | 0.22 | 0.42 | 22,798 | 1.92           | 1.05       |
| q_16047 | 0.38 | 0.48 | 22,995 | 1.91           | 0.47       |
| q_16283 | 0.41 | 0.49 | 22,759 | 1.91           | 0.33       |
| q_16023 | 0.52 | 0.50 | 23,502 | 1.90           | -0.05      |
| q_16225 | 0.26 | 0.44 | 23,584 | 1.89           | 0.91       |
| q_16287 | 0.47 | 0.50 | 22,760 | 1.87           | 0.12       |
| q_16294 | 0.33 | 0.47 | 23,399 | 1.84           | 0.62       |
| q_16086 | 0.30 | 0.46 | 23,741 | 1.74           | 0.78       |
| q_16016 | 0.52 | 0.50 | 23,053 | 1.70           | -0.04      |
| q_16063 | 0.45 | 0.50 | 23,024 | 1.63           | 0.21       |
| q_16235 | 0.43 | 0.50 | 23,713 | 1.63           | 0.27       |
| q_16056 | 0.51 | 0.50 | 23,619 | 1.60           | 0.00       |
| q_16050 | 0.37 | 0.48 | 23,318 | 1.60           | 0.49       |
| q_16118 | 0.31 | 0.46 | 22,962 | 1.58           | 0.75       |
| q_16292 | 0.48 | 0.50 | 23,370 | 1.58           | 0.08       |
| q_16082 | 0.48 | 0.50 | 23,507 | 1.54           | 0.11       |
| q_16240 | 0.71 | 0.46 | 22,785 | 1.46           | -0.80      |
| q_16195 | 0.32 | 0.47 | 23,344 | 1.43           | 0.70       |
| q_16279 | 0.68 | 0.47 | 23,165 | 1.38           | -0.72      |
| q_16048 | 0.54 | 0.50 | 23,388 | 1.36           | -0.13      |
| q_16085 | 0.45 | 0.50 | 22,692 | 1.36           | 0.24       |
| q_16026 | 0.68 | 0.46 | 23,839 | 1.32           | -0.77      |
| q_16223 | 0.44 | 0.50 | 22,971 | 1.28           | 0.28       |
| q_16258 | 0.65 | 0.48 | 23,095 | 1.27           | -0.62      |
| q_16150 | 0.63 | 0.48 | 23,032 | 1.26           | -0.54      |
| q_16144 | 0.13 | 0.33 | 23,155 | 1.22           | 1.97       |
| q_16055 | 0.54 | 0.50 | 23,180 | 1.21           | -0.17      |
| q_16008 | 0.63 | 0.48 | 22,537 | 1.21           | -0.56      |
| q_16203 | 0.66 | 0.48 | 22,938 | 1.16           | -0.69      |
| q_16087 | 0.65 | 0.48 | 22,953 | 1.14           | -0.65      |
| q_16221 | 0.64 | 0.48 | 23,157 | 1.13           | -0.62      |
| q_16298 | 0.59 | 0.49 | 23,283 | 1.10           | -0.38      |
| q_16220 | 0.61 | 0.49 | 22,901 | 1.02           | -0.49      |
| q_16171 | 0.51 | 0.50 | 23,063 | 0.98           | -0.02      |
| q_16042 | 0.60 | 0.49 | 23,208 | 0.95           | -0.48      |
| q_16140 | 0.60 | 0.49 | 23,143 | 0.91           | -0.51      |
| q_16272 | 0.58 | 0.49 | 23,048 | 0.89           | -0.40      |

Select the piece that completes the pattern on the right.

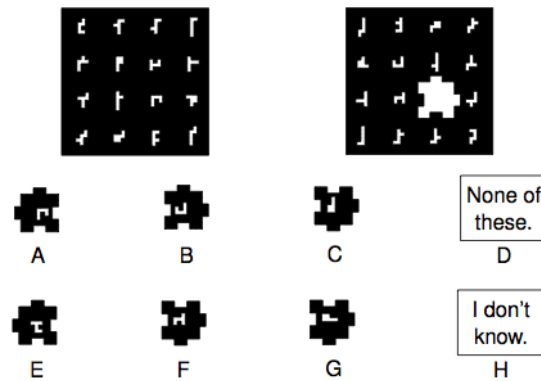

Figure S10. One item with an unusually high discrimination value

### Dropping item and re-running the analyses:

Given the unusual difficulty of this item, we decided to drop it and re-run the analyses to see whether this improves the psychometric properties of the test overall. In fact, it does (see below), so the item has been permanently deprecated.

```
# Dropping 16104
Rot2D_filtered2 <- Rot2D_filtered %>% dplyr::select(-q_16104)

# Re-running the IRT model
IRT_model_unidimensional2 <- mirt(Rot2D_filtered2, 1, itemtype = "2PL",
                                constrain = NULL)

save(IRT_model_unidimensional2, file = "IRT_model_unidimensional2.rdata")

load("/Users/kmath3/Desktop/Projects/2D_Rotation/IRT_model_unidimensional2.rdata")

# Item parameters
IRT_model_unidimensional_parameters2 <- coef(IRT_model_unidimensional2,
                                             IRTpars=TRUE, simplify = TRUE)

R2Dparameters2 <- IRT_model_unidimensional_parameters2$items[,1:2]
R2Dparameters2 <- as.data.frame(R2Dparameters2) %>%
  dplyr::mutate(item = rownames(.)) %>%
  relocate(item)
```

### Plotting item probability functions and test information



**Figure S11. Item Probability Functions**

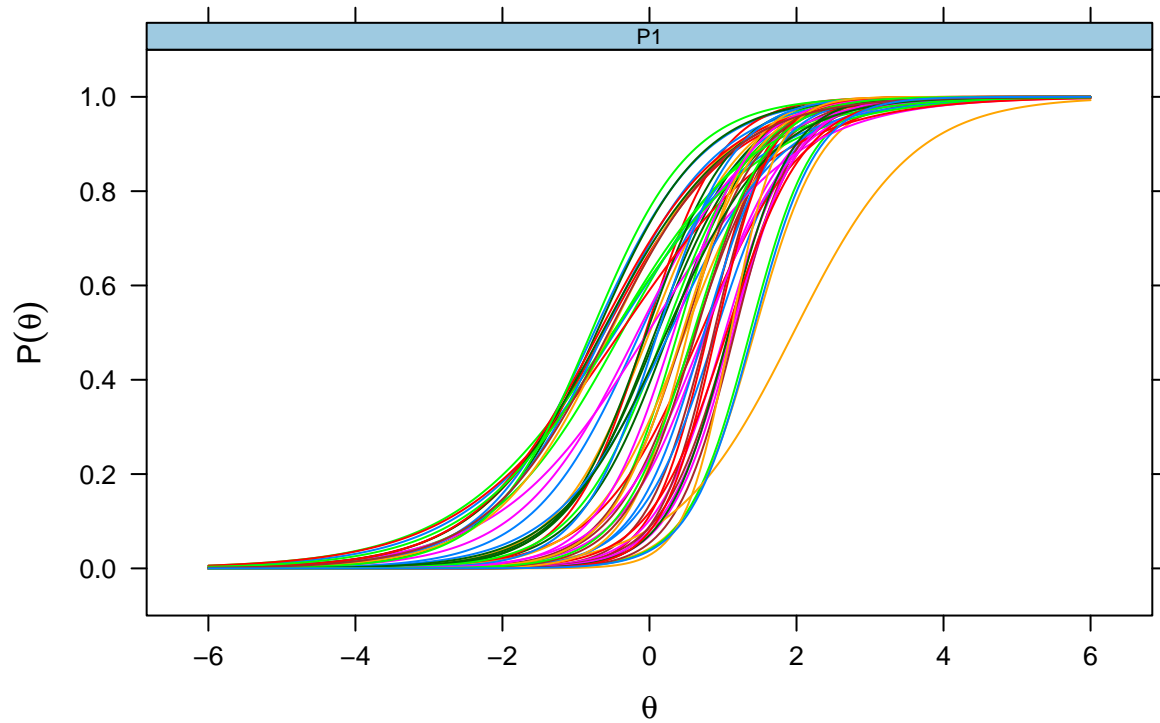

**Figure S12. Test Information and Standard Errors**

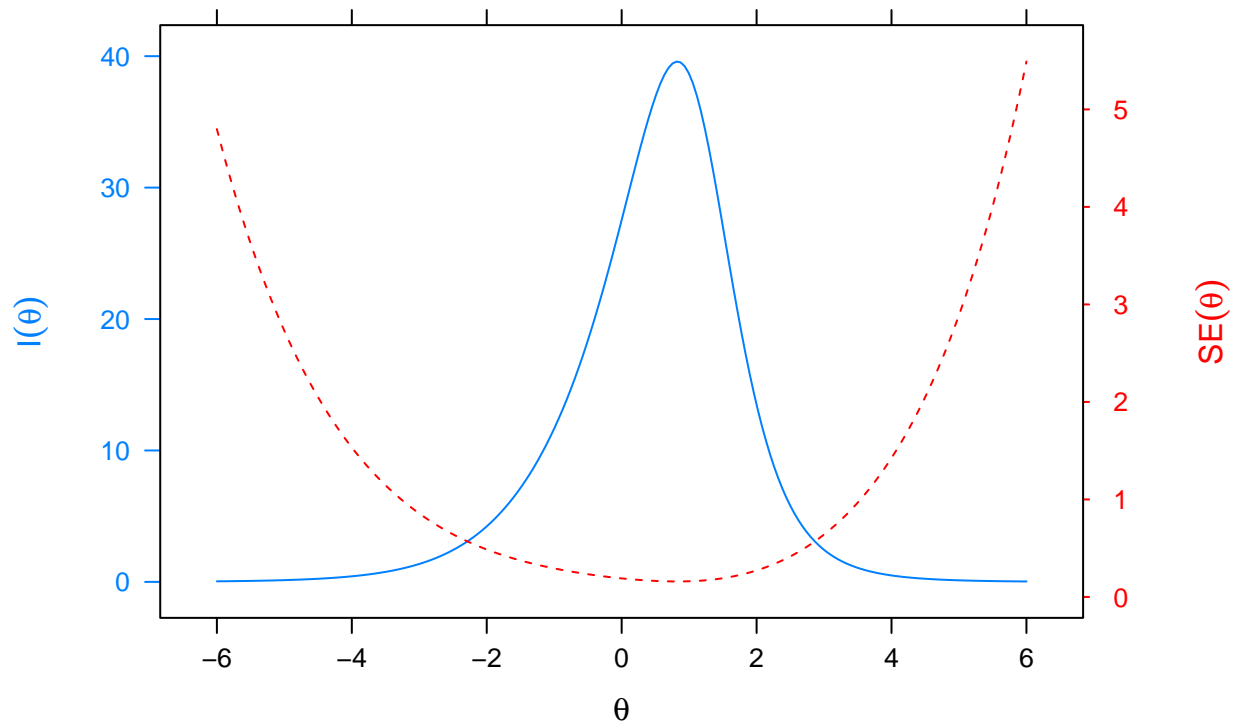

One additional item (shown in Figure S13) stood out for having a relatively high difficulty level. Similar to item 16104, which was dropped from the final scale, this item has a challenging distractor option. We decided to retain this item because analyses suggest that it does not interfere with the psychometric properties of the

overall scale.

Select the piece that completes the pattern on the right.

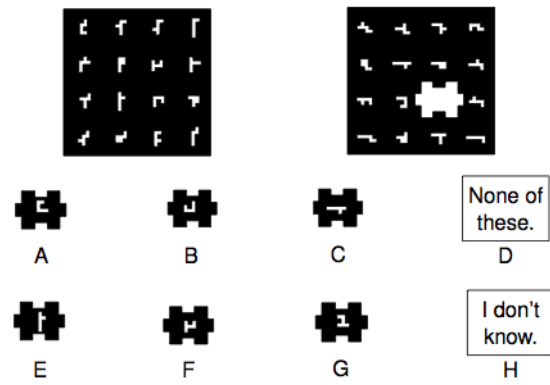

Figure S13. One other item (item 16144) had a fairly high difficulty level and a similar but less challenging distractor option

Table S8: Item descriptives and IRT parameters, in descending order of item discrimination

| item    | mean | sd   | N      | discrimination | difficulty |
|---------|------|------|--------|----------------|------------|
| q_16204 | 0.17 | 0.37 | 22,651 | 3.21           | 1.10       |
| q_16202 | 0.23 | 0.42 | 22,677 | 2.72           | 0.91       |
| q_16112 | 0.24 | 0.42 | 23,107 | 2.65           | 0.88       |
| q_16253 | 0.26 | 0.44 | 23,627 | 2.60           | 0.80       |
| q_16004 | 0.17 | 0.38 | 23,241 | 2.47           | 1.16       |
| q_16001 | 0.35 | 0.48 | 22,795 | 2.44           | 0.52       |
| q_16211 | 0.20 | 0.40 | 22,808 | 2.39           | 1.08       |
| q_16021 | 0.27 | 0.44 | 23,590 | 2.38           | 0.78       |
| q_16230 | 0.14 | 0.35 | 23,406 | 2.33           | 1.37       |
| q_16099 | 0.13 | 0.34 | 22,517 | 2.32           | 1.40       |
| q_16101 | 0.18 | 0.39 | 23,557 | 2.29           | 1.14       |
| q_16138 | 0.20 | 0.40 | 22,822 | 2.21           | 1.11       |
| q_16102 | 0.13 | 0.34 | 23,438 | 2.19           | 1.43       |
| q_16147 | 0.20 | 0.40 | 22,899 | 2.15           | 1.09       |
| q_16109 | 0.21 | 0.41 | 23,388 | 2.12           | 1.03       |
| q_16057 | 0.40 | 0.49 | 23,617 | 2.12           | 0.39       |
| q_16269 | 0.29 | 0.45 | 22,863 | 2.11           | 0.74       |
| q_16247 | 0.33 | 0.47 | 22,769 | 2.08           | 0.63       |
| q_16035 | 0.34 | 0.47 | 22,640 | 2.03           | 0.60       |
| q_16249 | 0.38 | 0.49 | 22,922 | 2.02           | 0.45       |
| q_16023 | 0.52 | 0.50 | 23,502 | 1.94           | -0.05      |
| q_16047 | 0.38 | 0.48 | 22,995 | 1.93           | 0.47       |
| q_16283 | 0.41 | 0.49 | 22,759 | 1.93           | 0.33       |
| q_16287 | 0.47 | 0.50 | 22,760 | 1.93           | 0.11       |
| q_16225 | 0.26 | 0.44 | 23,584 | 1.91           | 0.90       |
| q_16146 | 0.22 | 0.42 | 22,798 | 1.91           | 1.05       |
| q_16294 | 0.33 | 0.47 | 23,399 | 1.85           | 0.61       |
| q_16086 | 0.30 | 0.46 | 23,741 | 1.77           | 0.77       |
| q_16016 | 0.52 | 0.50 | 23,053 | 1.75           | -0.04      |
| q_16235 | 0.43 | 0.50 | 23,713 | 1.66           | 0.26       |
| q_16063 | 0.45 | 0.50 | 23,024 | 1.65           | 0.20       |
| q_16292 | 0.48 | 0.50 | 23,370 | 1.63           | 0.08       |
| q_16050 | 0.37 | 0.48 | 23,318 | 1.62           | 0.48       |
| q_16056 | 0.51 | 0.50 | 23,619 | 1.60           | 0.00       |
| q_16118 | 0.31 | 0.46 | 22,962 | 1.59           | 0.74       |
| q_16082 | 0.48 | 0.50 | 23,507 | 1.55           | 0.11       |
| q_16240 | 0.71 | 0.46 | 22,785 | 1.48           | -0.79      |
| q_16195 | 0.32 | 0.47 | 23,344 | 1.44           | 0.70       |
| q_16279 | 0.68 | 0.47 | 23,165 | 1.39           | -0.72      |
| q_16085 | 0.45 | 0.50 | 22,692 | 1.39           | 0.23       |
| q_16048 | 0.54 | 0.50 | 23,388 | 1.37           | -0.13      |
| q_16026 | 0.68 | 0.46 | 23,839 | 1.34           | -0.76      |
| q_16223 | 0.44 | 0.50 | 22,971 | 1.30           | 0.27       |
| q_16258 | 0.65 | 0.48 | 23,095 | 1.28           | -0.62      |
| q_16150 | 0.63 | 0.48 | 23,032 | 1.28           | -0.53      |
| q_16055 | 0.54 | 0.50 | 23,180 | 1.24           | -0.17      |
| q_16144 | 0.13 | 0.33 | 23,155 | 1.23           | 1.96       |
| q_16008 | 0.63 | 0.48 | 22,537 | 1.22           | -0.55      |
| q_16203 | 0.66 | 0.48 | 22,938 | 1.18           | -0.69      |
| q_16087 | 0.65 | 0.48 | 22,953 | 1.17           | -0.65      |
| q_16221 | 0.64 | 0.48 | 23,157 | 1.15           | -0.61      |
| q_16298 | 0.59 | 0.49 | 23,283 | 1.12           | -0.38      |
| q_16220 | 0.61 | 0.49 | 22,901 | 1.03           | -0.49      |
| q_16171 | 0.51 | 0.50 | 23,063 | 0.99           | -0.02      |
| q_16042 | 0.60 | 0.49 | 23,208 | 0.98           | -0.47      |
| q_16140 | 0.60 | 0.49 | 23,143 | 0.93           | -0.50      |
| q_16272 | 0.58 | 0.49 | 23,098 | 0.91           | -0.40      |

```
plot(IRT_model_unidimensional2, type = 'trace', facet_items = TRUE,
     main="Figure 14. Item Probability Functions")
```

**Figure S14. Item Probability Functions**

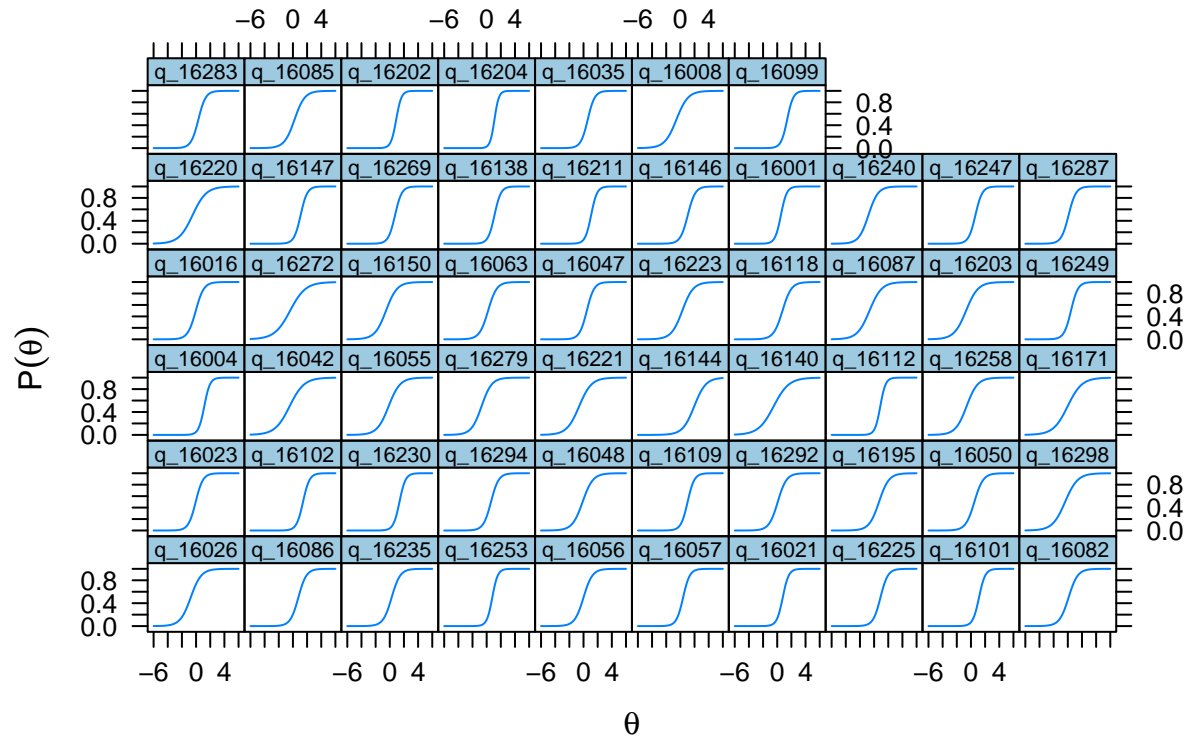

Descriptive statistics for the item parameters:

```
# Item discrimination
psych::describe(R2Dparameters2$a)

##      vars  n mean  sd median trimmed  mad   min  max range skew kurtosis   se
## X1      1  57 1.76 0.53   1.75   1.74 0.6 0.91 3.21   2.3 0.34   -0.59 0.07

# Item difficulty
psych::describe(R2Dparameters2$b)

##      vars  n mean  sd median trimmed  mad   min  max range skew kurtosis   se
## X1      1  57 0.34 0.68   0.39   0.33 0.76 -0.79 1.96   2.75 0.02   -0.98 0.09
```

## Lower-order factors

When scoring the lower-order factors, the full set of items is used (i.e., items requiring no rotation are not removed because these items form one of the lower-order factors). Item labels are obtained from the omega function output, and then the unidimensionality of each subfactor is evaluated.

```
# Item labels from the 'omega()' function output
F1_items <- omega4$model$lavaan[2]
F1_items <- unlist(stringr::str_extract_all(F1_items, "q_[[:digit:]]{5}"))
F2_items <- omega4$model$lavaan[3]
F2_items <- unlist(stringr::str_extract_all(F2_items, "q_[[:digit:]]{5}"))
F3_items <- omega4$model$lavaan[4]
F3_items <- unlist(stringr::str_extract_all(F3_items, "q_[[:digit:]]{5}"))
F4_items <- omega4$model$lavaan[5]
F4_items <- unlist(stringr::str_extract_all(F4_items, "q_[[:digit:]]{5}"))

# Unidimensionality of each subfactor

# Factor 1
cor_matrixF1<- cor(Rot2D_subset[,F1_items], use = "pairwise")
cor_matrix_smoothedF1 <- cor.smooth(cor_matrixF1)
omega_F1<- omega(cor_matrix_smoothedF1, plot = FALSE)
round(omega_F1$omega_h,2)
```

```
## [1] 0.92
# Factor 2
cor_matrixF2<- cor(Rot2D_subset[,F2_items], use = "pairwise")
cor_matrix_smoothedF2 <- cor.smooth(cor_matrixF2)
omega_F2<- omega(cor_matrix_smoothedF2, plot = FALSE)
round(omega_F2$omega_h,2)
```

```
## [1] 0.88
# Factor 3
cor_matrixF3<- cor(Rot2D_subset[,F3_items], use = "pairwise")
cor_matrix_smoothedF3 <- cor.smooth(cor_matrixF3)
omega_F3<- omega(cor_matrix_smoothedF3, plot = FALSE)
round(omega_F3$omega_h,2)
```

```
## [1] 0.81
# Factor 4
cor_matrixF4 <- cor(Rot2D_subset[,F4_items], use = "pairwise")
cor_matrix_smoothedF4 <- cor.smooth(cor_matrixF4)
omega_F4 <- omega(cor_matrix_smoothedF4, plot = FALSE)
round(omega_F4$omega_h,2)
```

```
## [1] 0.84
```

Because each lower-order factor demonstrates sufficient unidimensionality, we obtain IRT scale scores for them below.

```
# First factor: rotate both square and answer option
IRT_model_F1 <- mirt(Rot2D_subset[,F1_items], 1,
                    itemtype = "2PL",
                    constrain = NULL)

# Second factor: rotate square
IRT_model_F2 <- mirt(Rot2D_subset[,F2_items], 1,
                    itemtype = "2PL",
                    constrain = NULL)

# Third factor: no rotation
IRT_model_F3 <- mirt(Rot2D_subset[,F3_items], 1,
                    itemtype = "2PL",
                    constrain = NULL)

# Fourth factor: rotate answer option
IRT_model_F4 <- mirt(Rot2D_subset[,F4_items], 1,
                    itemtype = "2PL",
                    constrain = NULL)

save(IRT_model_F1, file = "IRT_model_F1.rdata")
save(IRT_model_F2, file = "IRT_model_F2.rdata")
save(IRT_model_F3, file = "IRT_model_F3.rdata")
save(IRT_model_F4, file = "IRT_model_F4.rdata")

load("/Users/kmather3/Desktop/Projects/2D_Rotation/IRT_model_F1.rdata")
load("/Users/kmather3/Desktop/Projects/2D_Rotation/IRT_model_F2.rdata")
load("/Users/kmather3/Desktop/Projects/2D_Rotation/IRT_model_F3.rdata")
load("/Users/kmather3/Desktop/Projects/2D_Rotation/IRT_model_F4.rdata")

# First factor
IRT_model_F1_parameters <- coef(IRT_model_F1, IRTpars=TRUE, simplify = TRUE)
R2Dparameters_F1 <- IRT_model_F1_parameters$items[,1:2]

# Second factor
IRT_model_F2_parameters <- coef(IRT_model_F2, IRTpars=TRUE, simplify = TRUE)
R2Dparameters_F2 <- IRT_model_F2_parameters$items[,1:2]

# Third factor
IRT_model_F3_parameters <- coef(IRT_model_F3, IRTpars=TRUE, simplify = TRUE)
R2Dparameters_F3 <- IRT_model_F3_parameters$items[,1:2]

# fourth factor
IRT_model_F4_parameters <- coef(IRT_model_F4, IRTpars=TRUE, simplify = TRUE)
R2Dparameters_F4 <- IRT_model_F4_parameters$items[,1:2]
```

Plotting the test information for each item type

**Figure S15. Test Information For Lower-order Factors**

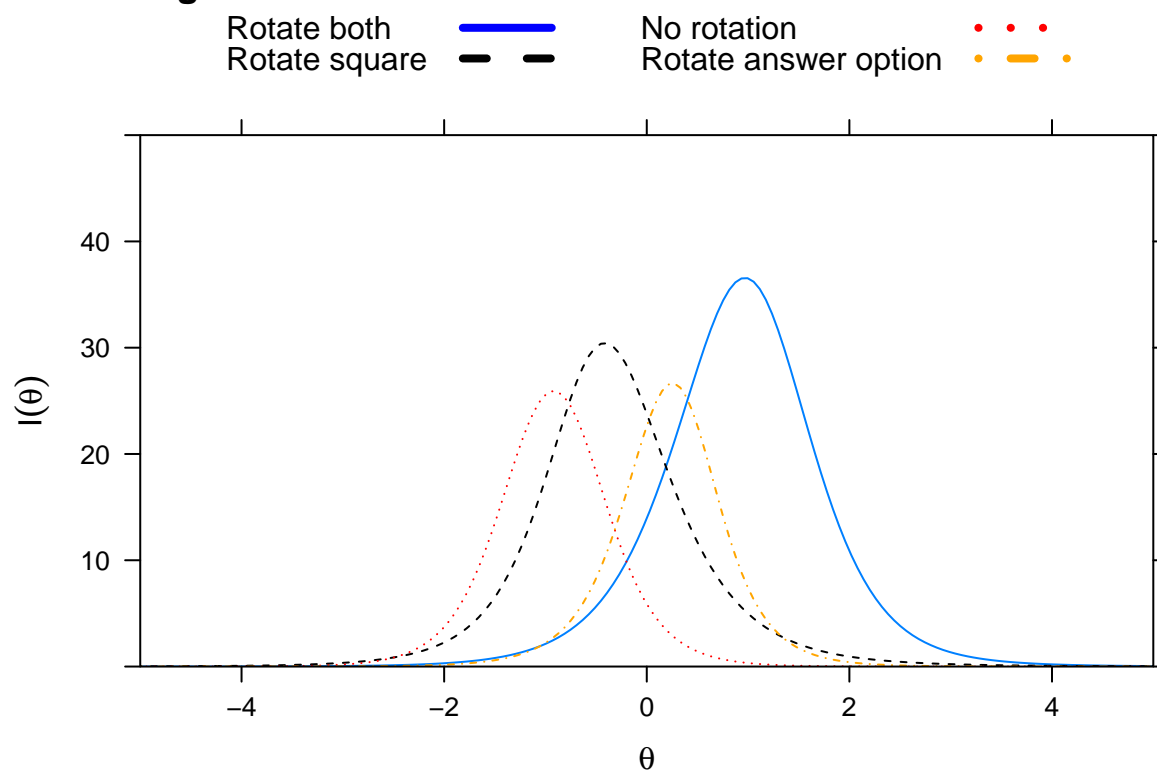

The code below was used to get IRT scores for general 2D rotation ability and the four lower-order factors.

```
ICARdata$R2D_IRT_general = fscores(IRT_model_unidimensional2)
ICARdata$R2D_IRT_Rotate_Both = fscores(IRT_model_F1)
ICARdata$R2D_IRT_Rotate_Square = fscores(IRT_model_F2)
ICARdata$R2D_IRT_Rotate_None = fscores(IRT_model_F3)
ICARdata$R2D_IRT_Rotate_Answer = fscores(IRT_model_F4)
```

Correlations between the lower-order 2D rotation abilities (based on IRT scores) are shown below. Correlations between the lower-order abilities were weak to moderate. The strongest of these relationships was between the ability to rotate the answer option only and the ability to rotate both the stimuli and the answer option ( $r = .39$ ). All other correlations were under .30. All 95% confidence intervals were  $\pm .012$ .

```
R2D_cols <- c("Rotate stimuli and answer", "Rotate stimuli only",
              "No rotation", "Rotate answer only")

R2D_abilities <- ICARdata %>%
  dplyr::select(R2D_IRT_Rotate_Both:R2D_IRT_Rotate_Answer) %>%
  setNames(R2D_cols)
```

Figure S16. Correlations between lower-order abilities

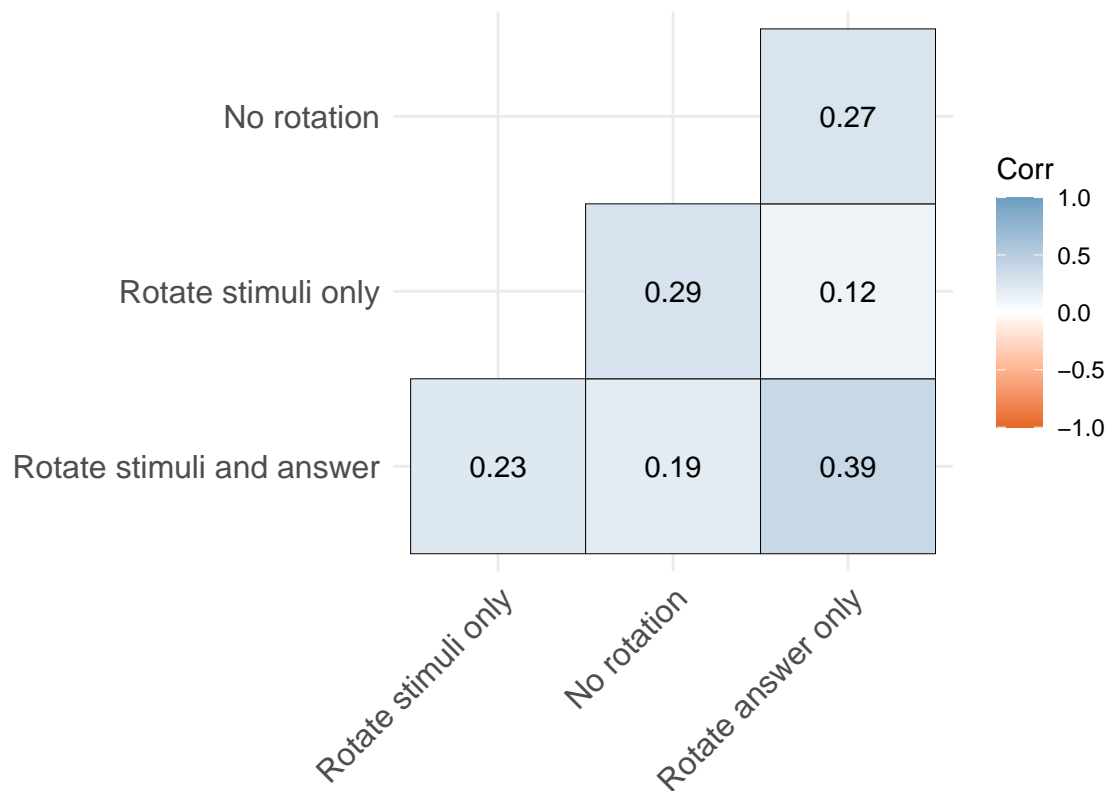

## Correlations between 2D rotation and other individual differences

The following plots show the correlations between 2D rotation ability and a variety of personality traits and cognitive abilities.

### Cognitive abilities

```
ability_cols <- c("2D-rotation", "Figural analogies", "Propositional reasoning",
  "Letter-number series", "3D-rotation", "Matrix reasoning",
  "Verbal reasoning", "Compound remote associates")

# t-scoring 2D rotation scores
ICARdata <- ICARdata %>%
  mutate(R2D_IRT_general = ((R2D_IRT_general - mean(R2D_IRT_general, na.rm=TRUE))/
    sd(R2D_IRT_general, na.rm=TRUE))*10+50)

abilities <- ICARdata %>%
  dplyr::select(R2D_IRT_general,
    ICAR_FA_IRT_score:ICAR_CRA_IRT_score) %>%
  setNames(ability_cols)
```

Figure S17. Correlations with other cognitive abilities

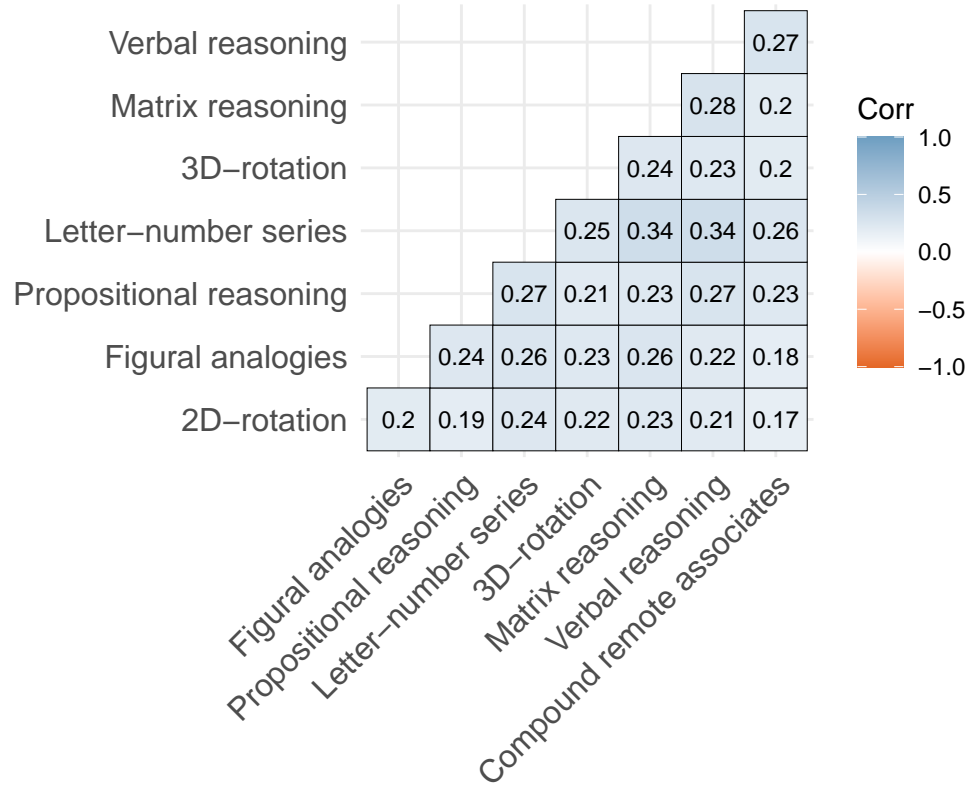

(all 95% confidence intervals  $\pm .003$ )



## Temperament

Figure S18. Correlation of 2D rotation with the 27 SPI traits

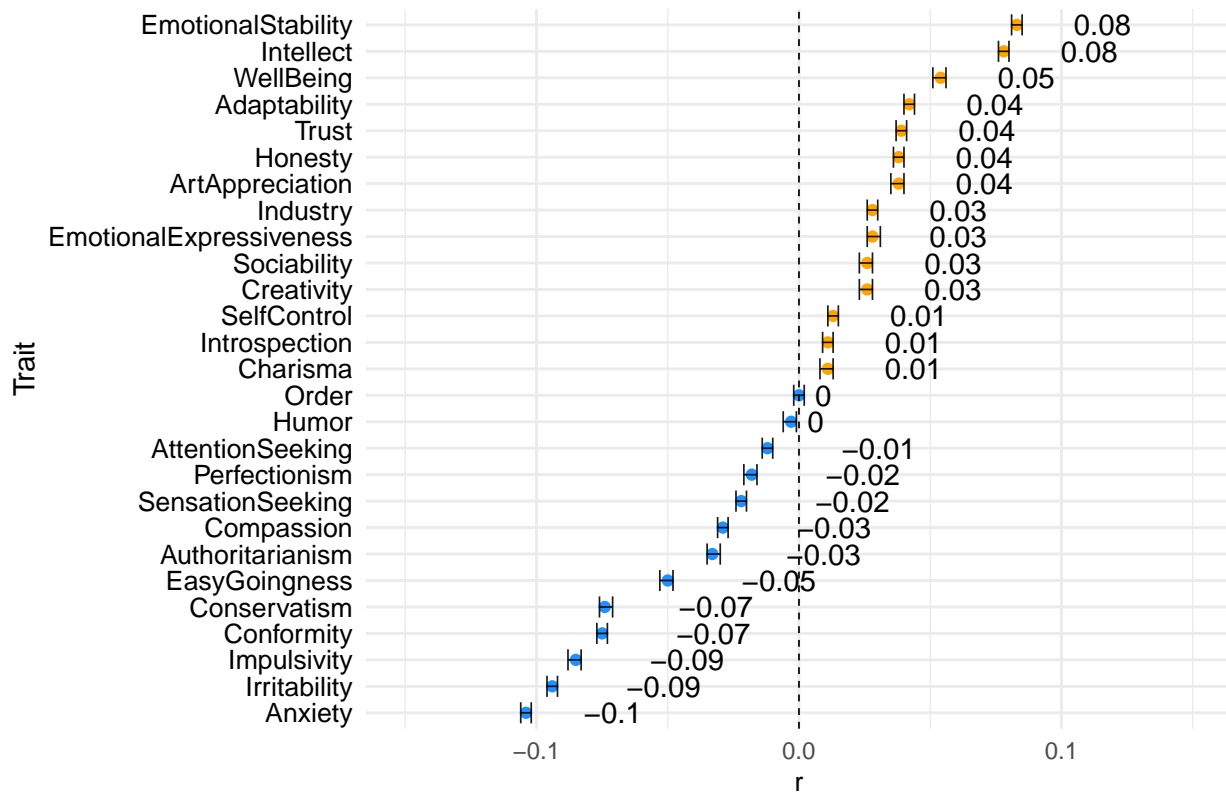

Figure S19. Correlations with the big five traits

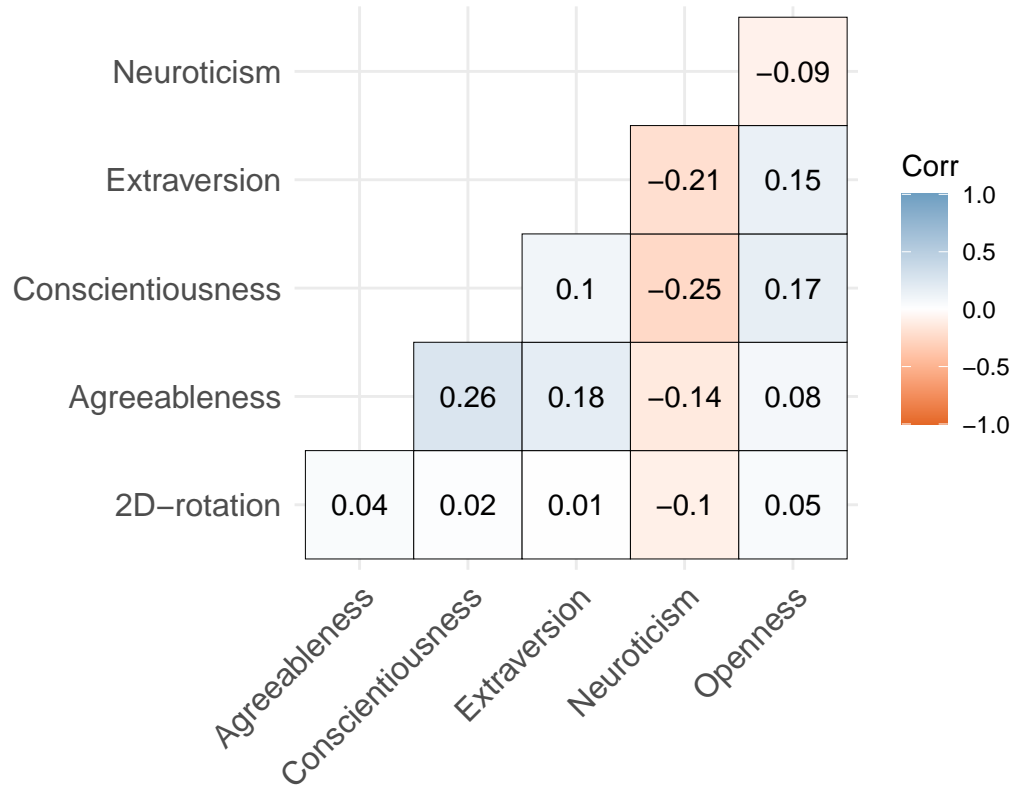

(All 95% Confidence Intervals +/- .003|)

## O\*NET job characteristics

Next, we examine the job characteristics most strongly associated with 2D rotation ability. Job characteristics are described on the ONET (<https://www.onetonline.org/>) website and can be organized into the six themes outlined by the ONET content model shown in the figure below.

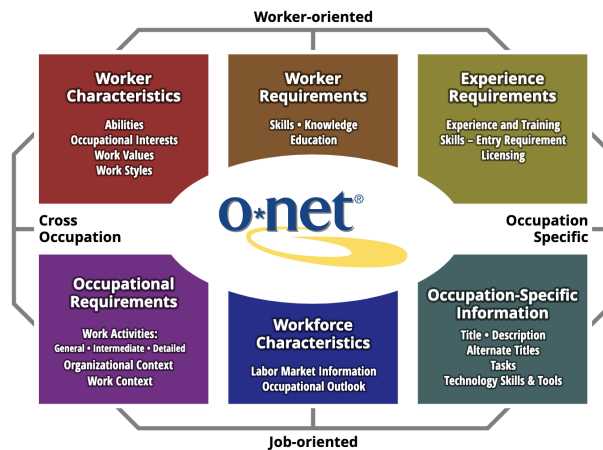

Figure S20. O\*NET Content model

First, we load the data with job characteristics and O\*NET occupation codes to merge with SAPA data. We then use the BISCUIT statistical learning technique (Elleman et al., 2020) to identify the job characteristics

most strongly associated with 2D rotation ability.

```
onet_data <- import(here("Data", "onet_char.csv"))
types <- import(here("Data", "onet_varnames_char_types.csv"))
CrosswalkTable <- import(here("Data", "PrestigeRtgsCrosswalk28Apr2021.csv")) # File with Occupational codes

# Dropping "level" job characteristics (only "importance" ratings for the characteristics will be used)
no_redund_data <- onet_data %>% dplyr::select(-ends_with("_Level"))
# Drop some variables that had highly redundant pairs (r>.9) following discussion among raters
varsToDrop <- types %>% filter(drop == "1")
# This removes 7 additional items
no_redund_data <- no_redund_data[, !names(no_redund_data) %in% varsToDrop$char_name]

CrosswalkTable$`O*NET-SOC 2010 Code` <- str_replace_all(CrosswalkTable$`O*NET-SOC 2010 Code`, "[^[:alnum:]]", "")

# Getting 2D rotation scores, grouping by occupation, and getting averages
R2D_data <- ICARdata %>%
  select(R2D_IRT_general, occupation) %>%
  group_by(occupation) %>%
  dplyr::summarise(R2D_Score = mean(R2D_IRT_general, na.rm = TRUE),
    n = length(!is.na(R2D_IRT_general))) %>%
  dplyr::filter(n>=100) %>%
  mutate('SAPA Job Title' = occupation)

# Joining the O*NET and R2D data
R2D_OPR <- inner_join(R2D_data, CrosswalkTable, by = "SAPA Job Title") %>%
  rename("occ_code" = "O*NET-SOC 2010 Code") %>%
  mutate(occ_code = as.numeric(occ_code)) %>%
  select(occ_code, occupation, R2D_Score, n, "SAPA Job Title")

R2D_OPR_onet <- left_join(no_redund_data, R2D_OPR, by = "occ_code")
# remove duplicated rows
R2D_OPR_onet <- R2D_OPR_onet %>% distinct()
# Edit the _Imp labels
names(R2D_OPR_onet) = gsub("_Imp", "", names(R2D_OPR_onet))

# running the bestScales function
bs_all <- bestScales(R2D_OPR_onet[,c(2:240,242)], criteria = cs(R2D_Score),
  cut = .0, n.item = 100, n.iter = 10, folds = 10,
  overlap = FALSE, check = TRUE, impute = "none", digits = 2)

# Getting a data frame with the job characteristics
bs_model_R2D <- as.data.frame(bs_all$items$R2D_Score)
bs_model_R2D$mean.r <- round(bs_model_R2D$mean.r, 2)
bs_model_R2D$sd.r <- round(bs_model_R2D$sd.r, 2)
rownames(bs_model_R2D) <- gsub("-", " ", rownames(bs_model_R2D))
colnames(bs_model_R2D) <- c("Frequency", "Mean Correlation", "Standard Deviation")
```

Table S9: 40 Job Characteristics Most Strongly associated with 2D Rotation

|                                                                               | Frequency | Mean Correlation | Standard Deviation |
|-------------------------------------------------------------------------------|-----------|------------------|--------------------|
| <b>20 strongest positive associations</b>                                     |           |                  |                    |
| Engineering and Technology                                                    | 10        | 0.56             | 0.01               |
| Physics Knowledge                                                             | 10        | 0.52             | 0.01               |
| Investigative                                                                 | 10        | 0.52             | 0.01               |
| Mathematical Reasoning                                                        | 10        | 0.49             | 0.01               |
| Science                                                                       | 10        | 0.49             | 0.01               |
| Mathematics Knowledge                                                         | 10        | 0.48             | 0.01               |
| Mathematics Skills                                                            | 10        | 0.48             | 0.01               |
| Design                                                                        | 10        | 0.48             | 0.01               |
| Technology Design                                                             | 10        | 0.48             | 0.01               |
| Analytical Thinking                                                           | 10        | 0.46             | 0.01               |
| Estimating the Quantifiable Characteristics of Products Events or Information | 10        | 0.46             | 0.01               |
| Systems Analysis                                                              | 10        | 0.46             | 0.01               |
| Information Ordering                                                          | 10        | 0.46             | 0.01               |
| Programming                                                                   | 10        | 0.45             | 0.01               |
| Number Facility                                                               | 10        | 0.45             | 0.01               |
| Analyzing Data or Information                                                 | 10        | 0.44             | 0.01               |
| Category Flexibility                                                          | 10        | 0.44             | 0.02               |
| Operations Analysis                                                           | 10        | 0.43             | 0.01               |
| Complex Problem Solving                                                       | 10        | 0.42             | 0.01               |
| Visualization                                                                 | 10        | 0.42             | 0.01               |
| <b>20 strongest negative associations</b>                                     |           |                  |                    |
| Frequency of Conflict Situations                                              | 9         | -0.21            | 0.01               |
| Therapy and Counseling                                                        | 10        | -0.21            | 0.01               |
| Social Perceptiveness                                                         | 10        | -0.22            | 0.01               |
| Physical Proximity                                                            | 10        | -0.22            | 0.02               |
| Stress Tolerance                                                              | 10        | -0.23            | 0.01               |
| Spend Time Making Repetitive Motions                                          | 10        | -0.23            | 0.01               |
| Clerical                                                                      | 10        | -0.24            | 0.02               |
| Deal With Physically Aggressive People                                        | 10        | -0.27            | 0.01               |
| Assisting and Caring for Others                                               | 10        | -0.29            | 0.01               |
| Contact With Others                                                           | 10        | -0.31            | 0.02               |
| Service Orientation                                                           | 10        | -0.31            | 0.01               |
| Social                                                                        | 10        | -0.32            | 0.01               |
| Deal With External Customers                                                  | 10        | -0.33            | 0.02               |
| Relationships                                                                 | 10        | -0.33            | 0.02               |
| Concern for Others                                                            | 10        | -0.34            | 0.02               |
| Social Orientation                                                            | 10        | -0.35            | 0.01               |
| Self Control                                                                  | 10        | -0.35            | 0.02               |
| Customer and Personal Service                                                 | 10        | -0.39            | 0.02               |
| Deal With Unpleasant or Angry People                                          | 10        | -0.39            | 0.01               |
| Performing for or Working Directly with the Public                            | 10        | -0.39            | 0.01               |

## Occupations and Majors

Below, we examine the highest scoring college majors and occupations on 2D rotation ability in comparison with 3D rotation ability.

### Occupations

```
# Getting the highest scoring occupations
occupations <- ICARdata %>%
  dplyr::group_by(occupation) %>%
  dplyr::summarise(R2D_Score = mean(R2D_IRT_general, na.rm = TRUE),
    R3D_Score = mean(ICAR_R3D_IRT_score, na.rm = TRUE),
    n = length(!is.na(R2D_IRT_general))) %>%
  dplyr::mutate(R2D_Percentile = round(dplyr::percent_rank(R2D_Score),2),
    R3D_Percentile = round(dplyr::percent_rank(R3D_Score),2) # Percentiles
  )
```

Table S10: Highest scoring occupations on 2D rotation (in descending order of 2D rotation percentile)

| occupation                                                              | N    | R2D  | R3D  | Difference |
|-------------------------------------------------------------------------|------|------|------|------------|
| Biologists                                                              | 554  | 0.90 | 0.91 | -0.01      |
| Computer Systems Engineers/Architect                                    | 1351 | 0.89 | 0.95 | -0.06      |
| Mechanical Engineer                                                     | 1034 | 0.89 | 0.92 | -0.03      |
| Network and Computer Systems Administrator                              | 828  | 0.86 | 0.87 | -0.01      |
| Web Developer                                                           | 1028 | 0.84 | 0.93 | -0.09      |
| Computer Software Engineer                                              | 4480 | 0.83 | 0.93 | -0.10      |
| Architect                                                               | 1596 | 0.82 | 0.81 | 0.01       |
| Electrical Engineers                                                    | 923  | 0.82 | 0.86 | -0.04      |
| Engineering Manager                                                     | 642  | 0.82 | 0.93 | -0.11      |
| Business Intelligence Analyst                                           | 1242 | 0.81 | 0.88 | -0.07      |
| Electronics Engineer                                                    | 562  | 0.81 | 0.86 | -0.05      |
| Computer and Information Systems Manager                                | 971  | 0.80 | 0.89 | -0.09      |
| Other - Military Officer Special and Tactical Operations Leader/Manager | 643  | 0.80 | 0.72 | 0.08       |
| Computer Programmer                                                     | 3194 | 0.78 | 0.91 | -0.13      |
| Other - Designer                                                        | 1018 | 0.77 | 0.82 | -0.05      |
| Information Technology Project Manager                                  | 1722 | 0.77 | 0.85 | -0.08      |
| Civil Engineer                                                          | 1468 | 0.76 | 0.77 | -0.01      |
| Risk Management Specialist                                              | 514  | 0.75 | 0.70 | 0.05       |
| Supervisor/Manager of Construction and/or Extraction Workers            | 675  | 0.75 | 0.66 | 0.09       |
| Sales Engineer                                                          | 585  | 0.75 | 0.74 | 0.01       |

Table S11: Highest scoring occupations on 3D rotation (in descending order of 3D rotation percentile)

| occupation                                 | N    | R2D  | R3D  | Difference |
|--------------------------------------------|------|------|------|------------|
| Computer Systems Engineers/Architect       | 1351 | 0.89 | 0.95 | -0.06      |
| Computer Software Engineer                 | 4480 | 0.83 | 0.93 | -0.10      |
| Web Developer                              | 1028 | 0.84 | 0.93 | -0.09      |
| Engineering Manager                        | 642  | 0.82 | 0.93 | -0.11      |
| Mechanical Engineer                        | 1034 | 0.89 | 0.92 | -0.03      |
| Computer Programmer                        | 3194 | 0.78 | 0.91 | -0.13      |
| Biologists                                 | 554  | 0.90 | 0.91 | -0.01      |
| Computer Security Specialist               | 581  | 0.73 | 0.89 | -0.16      |
| Computer and Information Systems Manager   | 971  | 0.80 | 0.89 | -0.09      |
| Business Intelligence Analyst              | 1242 | 0.81 | 0.88 | -0.07      |
| Network and Computer Systems Administrator | 828  | 0.86 | 0.87 | -0.01      |
| Electrical Engineers                       | 923  | 0.82 | 0.86 | -0.04      |
| Electronics Engineer                       | 562  | 0.81 | 0.86 | -0.05      |
| Information Technology Project Manager     | 1722 | 0.77 | 0.85 | -0.08      |
| Management Analyst                         | 1360 | 0.73 | 0.83 | -0.10      |
| Other - Designer                           | 1018 | 0.77 | 0.82 | -0.05      |
| Architect                                  | 1596 | 0.82 | 0.81 | 0.01       |
| Chief Executive Officer                    | 2115 | 0.70 | 0.81 | -0.11      |
| Instructional Designer and/or Technologist | 952  | 0.65 | 0.80 | -0.15      |
| Computer and Information Scientist         | 807  | 0.67 | 0.79 | -0.12      |

Table S12: Occupations with the greatest difference in performance (in favor of 2D rotation)

| occupation                                                     | N    | R2D  | R3D  | Difference |
|----------------------------------------------------------------|------|------|------|------------|
| Other - Construction and Related Work                          | 555  | 0.54 | 0.31 | 0.23       |
| Emergency Medical Technician and/or Paramedic                  | 573  | 0.67 | 0.47 | 0.20       |
| Medical Records and Health Information Technicians             | 600  | 0.33 | 0.16 | 0.17       |
| Other - Production Worker                                      | 871  | 0.44 | 0.27 | 0.17       |
| Insurance Sales Agent                                          | 588  | 0.28 | 0.13 | 0.15       |
| Food Service Attendant/Helper                                  | 578  | 0.33 | 0.19 | 0.14       |
| Medical and Clinical Laboratory Technician and/or Technologist | 1139 | 0.44 | 0.30 | 0.14       |
| Host/Hostess                                                   | 866  | 0.24 | 0.11 | 0.13       |
| Supervisor/Manager of Food Preparation and Serving Workers     | 1202 | 0.48 | 0.35 | 0.13       |
| Supervisor/Manager of Retail Sales Workers                     | 1619 | 0.44 | 0.31 | 0.13       |
| Security Guard                                                 | 628  | 0.48 | 0.36 | 0.12       |
| Sales Representative - Wholesale and Manufacturing             | 1264 | 0.43 | 0.31 | 0.12       |
| Pharmacist                                                     | 1672 | 0.55 | 0.44 | 0.11       |
| Acute Care Nurse                                               | 723  | 0.27 | 0.17 | 0.10       |
| Nursing Aid, Orderly and/or Attendant                          | 961  | 0.23 | 0.13 | 0.10       |

Table S12: Occupations with the greatest difference in performan (*continued*)

| occupation                                    | N    | R2D  | R3D  | Difference |
|-----------------------------------------------|------|------|------|------------|
| Computer Operator                             | 554  | 0.23 | 0.13 | 0.10       |
| Critical Care Nurse                           | 532  | 0.41 | 0.31 | 0.10       |
| Other - Health Technologist and/or Technician | 641  | 0.62 | 0.52 | 0.10       |
| Other - Sales Representative                  | 2392 | 0.24 | 0.14 | 0.10       |
| Telemarketer                                  | 506  | 0.20 | 0.11 | 0.09       |

Table S13: Occupations with the greatest difference in performance (in favor of 3D rotation)

| occupation                                                                 | N    | R2D  | R3D  | Difference |
|----------------------------------------------------------------------------|------|------|------|------------|
| Postsecondary Teacher - Psychology                                         | 606  | 0.30 | 0.74 | -0.44      |
| Special Education Teacher - Secondary School                               | 555  | 0.22 | 0.50 | -0.28      |
| Other - Therapist                                                          | 1504 | 0.31 | 0.57 | -0.26      |
| Musician and/or Singer                                                     | 795  | 0.55 | 0.76 | -0.21      |
| Librarian                                                                  | 1244 | 0.49 | 0.68 | -0.19      |
| Budget Analyst                                                             | 582  | 0.43 | 0.62 | -0.19      |
| Lawyer                                                                     | 4956 | 0.58 | 0.76 | -0.18      |
| Copy Writer                                                                | 946  | 0.21 | 0.39 | -0.18      |
| Supervisors/Manager of Non-Retail Sales Workers                            | 763  | 0.31 | 0.48 | -0.17      |
| Computer Security Specialist                                               | 581  | 0.73 | 0.89 | -0.16      |
| Computer Support Specialist                                                | 1671 | 0.63 | 0.78 | -0.15      |
| Instructional Designer and/or Technologist                                 | 952  | 0.65 | 0.80 | -0.15      |
| Writer                                                                     | 1029 | 0.42 | 0.57 | -0.15      |
| Public Relations Specialist                                                | 816  | 0.29 | 0.43 | -0.14      |
| Psychiatrist                                                               | 769  | 0.62 | 0.76 | -0.14      |
| Special Education Teacher - Preschool, Kindergarten, and Elementary School | 897  | 0.21 | 0.35 | -0.14      |
| Counselor - Mental Health                                                  | 1020 | 0.34 | 0.48 | -0.14      |
| Art Director                                                               | 1038 | 0.47 | 0.60 | -0.13      |
| Computer Programmer                                                        | 3194 | 0.78 | 0.91 | -0.13      |
| Editor                                                                     | 1254 | 0.64 | 0.76 | -0.12      |

## Majors

```

majors <- ICARdata %>%
  dplyr::group_by(major) %>%
  dplyr::summarise(R2D_Score = mean(R2D_IRT_general, na.rm = TRUE),
    R3D_Score = mean(ICAR_R3D_IRT_score, na.rm = TRUE),
    n = length(!is.na(R2D_IRT_general))) %>%
  dplyr::mutate(R2D_Percentile = round(dplyr::percent_rank(R2D_Score),2),
    R3D_Percentile = round(dplyr::percent_rank(R3D_Score),2) # Percentiles
  )

```

Table S14: Highest scoring majors on 2D rotation (in descending order of 2D rotation percentile)

| major                                | n     | R2D  | R3D  | Difference |
|--------------------------------------|-------|------|------|------------|
| Neuroscience                         | 993   | 1.00 | 1.00 | 0.00       |
| Applied Mathematics                  | 1070  | 0.99 | 0.99 | 0.00       |
| Physics                              | 4120  | 0.99 | 0.99 | 0.00       |
| Materials Science and Engineering    | 1004  | 0.98 | 0.97 | 0.01       |
| Biomedical Engineering               | 1646  | 0.97 | 0.96 | 0.01       |
| Manufacturing and Design Engineering | 1197  | 0.96 | 0.73 | 0.23       |
| Mathematics                          | 4702  | 0.95 | 0.95 | 0.00       |
| Chemical and Biological Engineering  | 4015  | 0.94 | 0.91 | 0.03       |
| Mechanical Engineering               | 9727  | 0.93 | 0.89 | 0.04       |
| Aerospace Engineering                | 1812  | 0.92 | 0.90 | 0.02       |
| Anthropology                         | 1915  | 0.91 | 0.92 | -0.01      |
| Geological Sciences                  | 1911  | 0.90 | 0.84 | 0.06       |
| Industrial Engineering               | 2725  | 0.88 | 0.88 | 0.00       |
| Chemistry                            | 5829  | 0.88 | 0.87 | 0.01       |
| Actuarial Sciences                   | 618   | 0.86 | 0.92 | -0.06      |
| Biology                              | 13885 | 0.86 | 0.86 | 0.00       |
| Other Mathematics Major              | 619   | 0.85 | 0.85 | 0.00       |
| Religion                             | 803   | 0.83 | 0.84 | -0.01      |

Table S14: Highest scoring majors on 2D rotation (*continued*)

| major                  | n     | R2D  | R3D  | Difference |
|------------------------|-------|------|------|------------|
| Electrical Engineering | 10574 | 0.82 | 0.81 | 0.01       |
| Philosophy             | 2202  | 0.81 | 0.95 | -0.14      |

Table S15: Highest scoring majors on 3D rotation (in descending order of 3D rotation percentile)

| major                               | n     | R2D  | R3D  | Difference |
|-------------------------------------|-------|------|------|------------|
| Neuroscience                        | 993   | 1.00 | 1.00 | 0.00       |
| Applied Mathematics                 | 1070  | 0.99 | 0.99 | 0.00       |
| Physics                             | 4120  | 0.99 | 0.99 | 0.00       |
| Materials Science and Engineering   | 1004  | 0.98 | 0.97 | 0.01       |
| Biomedical Engineering              | 1646  | 0.97 | 0.96 | 0.01       |
| Mathematics                         | 4702  | 0.95 | 0.95 | 0.00       |
| Philosophy                          | 2202  | 0.81 | 0.95 | -0.14      |
| Actuarial Sciences                  | 618   | 0.86 | 0.92 | -0.06      |
| Anthropology                        | 1915  | 0.91 | 0.92 | -0.01      |
| Chemical and Biological Engineering | 4015  | 0.94 | 0.91 | 0.03       |
| Aerospace Engineering               | 1812  | 0.92 | 0.90 | 0.02       |
| Statistics                          | 1428  | 0.77 | 0.90 | -0.13      |
| Mechanical Engineering              | 9727  | 0.93 | 0.89 | 0.04       |
| Music                               | 3066  | 0.79 | 0.88 | -0.09      |
| Industrial Engineering              | 2725  | 0.88 | 0.88 | 0.00       |
| Chemistry                           | 5829  | 0.88 | 0.87 | 0.01       |
| Biology                             | 13885 | 0.86 | 0.86 | 0.00       |
| Other Mathematics Major             | 619   | 0.85 | 0.85 | 0.00       |
| Geological Sciences                 | 1911  | 0.90 | 0.84 | 0.06       |
| Religion                            | 803   | 0.83 | 0.84 | -0.01      |

Table S16: Majors with the greatest discrepancy in performance (in favor of 2D rotation)

| major                                  | n     | R2D  | R3D  | Difference |
|----------------------------------------|-------|------|------|------------|
| Culinary Arts and Sciences             | 605   | 0.45 | 0.15 | 0.30       |
| Medical Laboratory/Technology          | 4117  | 0.37 | 0.07 | 0.30       |
| Fashion                                | 2010  | 0.34 | 0.05 | 0.29       |
| Pharmacology                           | 4866  | 0.49 | 0.23 | 0.26       |
| Criminal Justice and Corrections       | 2412  | 0.28 | 0.04 | 0.24       |
| Manufacturing and Design Engineering   | 1197  | 0.96 | 0.73 | 0.23       |
| Science Education                      | 2412  | 0.36 | 0.14 | 0.22       |
| Animal Sciences                        | 2335  | 0.60 | 0.41 | 0.19       |
| Other Natural Sciences Major           | 6196  | 0.71 | 0.54 | 0.17       |
| Interior Design                        | 2090  | 0.61 | 0.45 | 0.16       |
| Nutrition and Wellness                 | 2265  | 0.40 | 0.25 | 0.15       |
| Accounting                             | 18603 | 0.41 | 0.26 | 0.15       |
| Botany                                 | 1543  | 0.43 | 0.29 | 0.14       |
| Other Medicine and Allied Health Major | 15935 | 0.42 | 0.29 | 0.13       |
| Dentistry                              | 4441  | 0.22 | 0.10 | 0.12       |
| Graphic Arts                           | 4478  | 0.69 | 0.58 | 0.11       |
| Mathematics Education                  | 1072  | 0.78 | 0.67 | 0.11       |
| Other Engineering and Technology Major | 11620 | 0.75 | 0.64 | 0.11       |
| Fiction Writing                        | 752   | 0.80 | 0.70 | 0.10       |
| Nursing                                | 16436 | 0.18 | 0.08 | 0.10       |

Table S17: Majors with the greatest discrepancy in performance (in favor of 3D rotation)

| major                  | n    | R2D  | R3D  | Difference |
|------------------------|------|------|------|------------|
| Special Education      | 2030 | 0.18 | 0.40 | -0.22      |
| Communication Sciences | 1148 | 0.21 | 0.43 | -0.22      |

Table S17: Majors with the greatest discrepancy in performan (*continued*)

| major                                     | n     | R2D  | R3D  | Difference |
|-------------------------------------------|-------|------|------|------------|
| Journalism                                | 3806  | 0.15 | 0.36 | -0.21      |
| Radio, Television and Film Communication  | 1732  | 0.32 | 0.49 | -0.17      |
| Spanish                                   | 765   | 0.50 | 0.66 | -0.16      |
| Government                                | 1198  | 0.23 | 0.39 | -0.16      |
| Law and Legal Studies                     | 8363  | 0.27 | 0.42 | -0.15      |
| Public Relations and Advertising          | 2909  | 0.10 | 0.24 | -0.14      |
| Philosophy                                | 2202  | 0.81 | 0.95 | -0.14      |
| Statistics                                | 1428  | 0.77 | 0.90 | -0.13      |
| Computer Programming                      | 14379 | 0.68 | 0.80 | -0.12      |
| Management Information Systems            | 1844  | 0.65 | 0.77 | -0.12      |
| Economics                                 | 5976  | 0.70 | 0.82 | -0.12      |
| International Studies                     | 750   | 0.57 | 0.68 | -0.11      |
| Linguistics                               | 1783  | 0.68 | 0.79 | -0.11      |
| Political Science                         | 9189  | 0.46 | 0.56 | -0.10      |
| Other Communications Major                | 2112  | 0.25 | 0.34 | -0.09      |
| Other Cultural and Regional Studies Major | 987   | 0.36 | 0.45 | -0.09      |
| Music                                     | 3066  | 0.79 | 0.88 | -0.09      |
| History                                   | 4872  | 0.52 | 0.61 | -0.09      |
